1 Developmental and genetic regulation of the human cortex transcriptome in schizophrenia

2

3 Andrew E Jaffe<sup>1,2,3,4,#</sup>, Richard E Straub<sup>1</sup>, Joo Heon Shin<sup>1</sup>, Ran Tao<sup>1</sup>, Yuan Gao<sup>1</sup>, Leonardo  
4 Collado Torres<sup>1,3,4</sup>, Tony Kam-Thong<sup>5</sup>, Hualin S Xi<sup>6</sup>, Jie Quan<sup>6</sup>, Qiang Chen<sup>1</sup>, Carlo  
5 Colantuoni<sup>1,7,8</sup>, Bill Ulrich<sup>1</sup>, Brady J. Maher<sup>1,9</sup>, Amy Deep-Soboslay<sup>1</sup>, The BrainSeq Consortium,  
6 Alan Cross<sup>10</sup>, Nicholas J. Brandon<sup>10</sup>, Jeffrey T Leek<sup>3,4</sup>, Thomas M. Hyde<sup>1,7,9</sup>, Joel E. Kleinman<sup>1,7</sup>,  
7 Daniel R Weinberger<sup>1,8,9,11,&</sup>

- 8 1. Lieber Institute for Brain Development, Johns Hopkins Medical Campus, Baltimore, MD  
9 21205, USA  
10 2. Department of Mental Health, Johns Hopkins Bloomberg School of Public Health, Baltimore,  
11 MD, 21205, USA  
12 3. Department of Biostatistics, Johns Hopkins Bloomberg School of Public Health, Baltimore,  
13 MD, 21205, USA  
14 4. Center for Computational Biology, Johns Hopkins University, Baltimore MD 21205 USA  
15 5. Roche Pharma Research and Early Development, Pharmaceutical Sciences, Roche  
16 Innovation Center Basel, F. Hoffmann-La Roche Ltd, Grenzacherstrasse 124, 4070 Basel,  
17 Switzerland  
18 6. Computational Sciences, Pfizer Inc, Cambridge, MA 02140  
19 7. Department of Neurology, Johns Hopkins School of Medicine, Baltimore, MD 21205, USA  
20 8. Department of Neuroscience, Johns Hopkins School of Medicine, Baltimore, MD 21205,  
21 USA  
22 9. Department of Psychiatry and Behavioral Sciences, Johns Hopkins School of Medicine,  
23 Baltimore, MD 21205, USA  
24 10. AstraZeneca Neuroscience iMed, IMED Biotech Unit, Cambridge, MA, 02139 USA  
25 11. McKusick-Nathans Institute of Genetic Medicine, Johns Hopkins School of Medicine,  
26 Baltimore, MD 21205, USA

27 # [andrew.jaffe@libd.org](mailto:andrew.jaffe@libd.org) (co-corresponding)

28 & [drweinberger@libd.org](mailto:drweinberger@libd.org) (co-corresponding)

29

30

31 **Summary:**

32 GWAS have identified over 108 loci that confer risk for schizophrenia, but risk mechanisms for  
33 individual loci are largely unknown. Using developmental, genetic, and illness-based RNA  
34 sequencing expression analysis, we characterized the human brain transcriptome around these  
35 loci and found enrichment for developmentally regulated genes with novel examples of shifting  
36 isoform usage across pre- and post-natal life. Within patients and controls, we implemented a  
37 novel algorithm for RNA quality adjustment, and identified 237 genes significantly associated  
38 with diagnosis that replicated in an independent case-control dataset. These genes implicated  
39 synaptic processes and were strongly regulated in early development ( $p < 10^{-20}$ ). Lastly, we  
40 found 42.5% of risk variants associate with nearby genes and diverse transcript features that  
41 converge on developmental regulation and subsequent dysregulation in illness and 34 loci show  
42 convergent directionality with illness association implicating specific causative transcripts. These  
43 data offer new targets for modeling schizophrenia risk in cellular systems.

44

45

46 **Key Words:** schizophrenia, functional genomics, RNA sequencing, human postmortem brain,  
47 differential expression analysis, RNA degradation

48

## 49 **Introduction:**

50 Schizophrenia (SCZD) is a prevalent neuropsychiatric disorder with a combination of  
51 genetic and environmental risk factors. Research over the last several decades has suggested  
52 that SZCD is a neurodevelopmental disorder arising through altered connectivity and plasticity  
53 in relevant neural circuits. However, discovering the causative mechanisms of these putatively  
54 developmental deficits has been very challenging<sup>1</sup>. The most consistent evidence of etiologic  
55 mechanisms related to SCZD has come from a recent genome-wide association study (GWAS)  
56 in which over a hundred independent single nucleotide polymorphisms (SNPs) were identified  
57 having an allele frequency difference between patients with schizophrenia and unaffected  
58 controls<sup>2</sup>. While these findings have identified regions in the genome harboring genetic risk  
59 variants, almost all of the associated SNPs are non-coding, located in intronic or intergenic  
60 sequence, and hypothesized to have some role in regulating expression<sup>3</sup>. However, the exact  
61 gene(s) and transcript(s) potentially regulated by risk-associated genetic variation are uncertain,  
62 as most of these genomic regions contain multiple genes. In principle, the effects of non-coding  
63 genetic variation, by whatever mechanisms (e.g. promoter, enhancer, splicing, noncoding RNA,  
64 epigenetics, etc), should be observed in the transcriptome. Therefore, to better understand how  
65 these regions of genetic risk and their underlying genotypes may confer risk of schizophrenia  
66 and to better characterize the molecular biology of the disease state, we sequenced the polyA+  
67 transcriptomes from the prefrontal cortex of 495 individuals with ages across the lifespan,  
68 ranging from the second trimester of fetal life to 85 years of age (see Table S1), including 175  
69 patients with schizophrenia (see Figure S1).

70 Here we identify novel expression associations with genetic risk and with illness state  
71 and explore developmentally regulated features, including a subset of genes with previously  
72 uncharacterized isoform shifts in expression patterns across the fetal-postnatal developmental  
73 transition. We further identify many more expression quantitative loci (eQTLs) in schizophrenia  
74 risk regions than previously observed by surveying the full spectrum of associated expression  
75 features to generate potential molecular mechanisms underlying genetic risk. We also explore  
76 differential gene expression associated with the state of illness in a comparison of the  
77 postmortem brains of patients with schizophrenia with non-psychiatric controls. By  
78 incorporating a novel, experiment-based algorithm to account for RNA quality differences which  
79 have not been adequately controlled in earlier studies, we report a high degree of replication  
80 across independent case-control gene expression datasets<sup>4,5</sup>. By combining genetic risk at the  
81 population-level with eQTLs and case-control differences, we identify putative human frontal  
82 cortex mechanisms underlying risk for schizophrenia and replicable molecular features of the  
83 illness state.

84

## 85 **Results**

86 We performed deep polyA+ RNA-sequencing of 495 individuals, ranging in age from the  
87 second trimester of fetal life to 85 years old (see Table S1), including 175 patients with

88 schizophrenia (see Figure S1). We quantified expression across multiple transcript features,  
89 including: annotated 1) genes and 2) exons, 3) annotation-guided transcripts<sup>4</sup> as well as  
90 alignment-based 4) exon-exon splice junctions<sup>5</sup> and 5) expressed regions (ERs)<sup>6</sup>. These last  
91 two expression features were selected to reduce reliance on the potentially incomplete  
92 annotation of the brain transcriptome<sup>7</sup> (Results S1). We find a large number of moderately  
93 expressed and previously unannotated splice junctions that tag potential transcripts with  
94 alternative exonic boundaries or exon skipping (Figure S2), 95% of which are also found in  
95 other large RNA-seq datasets, including a subset that were brain-specific (Table 1). Similarly,  
96 we find that only 56.1% of ERs were annotated to strictly exonic sequence – many ERs  
97 annotated to strictly intronic (22.3%) or intergenic (8.5%) sequence, or were transcribed beyond  
98 existing annotation (e.g. extended UTRs, extended exonic sequence).

99

### 100 Developmental regulation of transcription and shifting isoform usage

101 Characterizing expression changes in unaffected individuals, particularly across brain  
102 development beginning with prenatal life, has previously offered disease-relevant insights into  
103 particular genomic loci<sup>8-12</sup>. Specifically, we and others<sup>7,13,14</sup> have shown that genomic risk loci  
104 associated with neurodevelopmental disorders including schizophrenia are enriched for  
105 transcript features showing differential expression between fetal and postnatal brains. Here too,  
106 among the 320 control samples, the strongest component of expression change corresponded  
107 to large expression changes in the contrast of pre-natal and early postnatal life, in line with  
108 previous data<sup>7</sup> (Figure 1A). We further defined a developmental regulation statistic for each  
109 expressed feature using a generalized additive model (see Methods) and found widespread  
110 developmental regulation of these expressed features (Results S2, Table S3, Figure S3),  
111 including of previously unannotated sequence (Table S4). Motivated in part by previous reports  
112 of preferential fetal isoform use among schizophrenia candidate risk genes<sup>10,11</sup> (e.g. predominant  
113 fetal versus predominant postnatal isoforms), we next formally identified the subset of genes  
114 showing alternative isoform expression patterns across fetal and postnatal life using those  
115 exons, junctions, transcripts, and ERs that meet the statistical criteria for developmental  
116 regulation (, i.e. those genes with at least one developmentally changing feature, see Methods).  
117 There were 9,161 Ensembl genes (28% of the set of developmentally regulated genes) with  
118 both positive and negative expression features having genome-wide significant correlations to  
119 age (each with  $p_{\text{bonf}} < 0.05$ , Figure 1B, Table S5, Figure S4). In other words, these represent  
120 alternate transcript isoforms of the same gene that show opposite patterns of expression across  
121 the prenatal-postnatal transition.

122 We performed gene set analyses of those genes with shifting isoform usage compared  
123 to the larger set of genes with at least one developmentally regulated feature but without shifting  
124 isoform usage to identify more specific biological functions of this unique form of developmental  
125 regulation (Table S6). The set of developmentally shifting isoforms was relatively enriched for  
126 localization, catalytic activity, signaling-related processes, including synaptic transmission and  
127 cell communication, and neuronal development, among many others. Interestingly, genes  
128 identified with shifting isoforms across development based exclusively on junction counts were

129 enriched for both dopaminergic ( $FDR=5.11 \times 10^{-7}$ ) and glutamatergic ( $FDR=4.02 \times 10^{-4}$ ) synapse  
130 KEGG pathways (Figure 1C), the two neurotransmitter systems most prominently implicated in  
131 schizophrenia pathogenesis and treatment.

132

### 133 Schizophrenia risk is associated with shifting isoform usage across brain development

134 Based on the KEGG analysis, we hypothesized that the genes with developmentally  
135 regulated isoform shifts may relate to risk for schizophrenia. Indeed, genes within the SZCD  
136 GWAS risk loci were more likely to harbor these isoform shifts occurring in the fetal-postnatal  
137 developmental transition compared with the rest of the expressed transcriptome (Figure 2D).  
138 For example, genes with developmental isoform shifts identified by exon and junction counts  
139 were 62% ( $p=4.1 \times 10^{-5}$ ) and 69% ( $p=5.6 \times 10^{-7}$ ) more likely to lie within the PGC2 risk regions  
140 (with permutation-based  $p = 0.048$  and  $0.02$  respectively, see Methods) than developmentally  
141 regulated genes without isoforms shifts (Table S7). These results further underscore the role of  
142 changes in the regulation of transcription and splicing in early brain development in  
143 schizophrenia risk.

144

### 145 Expression associations with chronic schizophrenia illness

146 We next explored the expression landscape of the prefrontal cortex of the schizophrenia  
147 illness state and its potential link with developmental regulation and genetic risk. We performed  
148 differential expression modeling using 351 higher quality adult samples (196 controls, 155  
149 cases), and found extensive bias by RNA degradation within both univariate analysis (where  
150 12,686 genes were differentially expressed at  $FDR < 5\%$ ) and even after adjusting for measured  
151 levels of RNA quality typical of all prior studies (Figure S5). We therefore implemented a  
152 statistical framework based on an independent molecular degradation experiment (see  
153 Methods, Results S3), called “quality surrogate variable analysis” (qSVA, see Methods)<sup>15</sup>. We  
154 further utilized replication RNA-seq data from the CommonMind Consortium (CMC) dataset,  
155 using a subset of age range-matched 159 schizophrenia patients and 172 controls.  
156 Interestingly, adjusting for observed factors related to RNA quality that characterize all earlier  
157 studies of gene expression in schizophrenic brain, the proportion of genes with differentially  
158 expressed features at genome wide significant  $FDR < 5\%$  that replicate (with directionality and  
159 marginal significance) in the CMC dataset was very small (only 11.0%, 244/2,215, Figure S6). In  
160 contrast, using our new statistical qSVA approach, 40.1% of differentially expressed genes at  
161  $FDR < 5\%$  ( $N=75/183$ ) replicate in the CMC dataset. At genome-wide significant  $FDR < 10\%$   
162 (see Methods), we identified 237 genes with 556 DE features that replicated in the CMC dataset  
163 (33.6% gene-level replication rate, Table S8, Table S9).

164 The differences in expression levels between cases and controls of these DE features  
165 were generally small in both our discovery and the replication datasets (Figure 2A, Figure S7),  
166 perhaps a direct result of the clinical and molecular heterogeneity of this disorder<sup>13,16</sup>. Gene  
167 ontology analysis implicated transporter- and channel-related signaling as significantly

168 consistently downregulated in patients compared to controls across genes annotated in all three  
169 expression summarizations (Figure 2B, Table S10). These results suggested decreased  
170 signaling in patients with schizophrenia, but could raise the possibility that these replicated  
171 expression differences between patients and controls relate to the epiphenomena of illness,  
172 such as treatment with antipsychotics which affect signaling in the brain<sup>14</sup>, as the majority of  
173 patients were on anti-psychotics at the time of death (64%, Table S1). Only two genes (*KLC1*  
174 and *PPP2R3A*) in the 108 significant schizophrenia GWAS loci were significantly differentially  
175 expressed. However, in an exploratory analysis, we found that overall the differential expression  
176 statistics within the loci were significantly different than those features outside the loci (Results  
177 S4, Figure S8, Table S11). We also investigated the relationships between transcription and  
178 genomic risk for schizophrenia using genome wide Risk Profile Scores (RPS) from each subject  
179 calculated as previously described<sup>2</sup> (see Methods). Using the subset of 209 Caucasian  
180 samples, we largely found a lack of association between RPS and expression of individual  
181 expression features. We further found a lack of enrichment of RPS on expression comparing the  
182 differentially expressed and replicated case-control features to the rest of the transcriptome, as  
183 well as lack of directionally consistency between RPS- and diagnosis-associated statistics  
184 among expressed features (Table S12). These results further suggest that the significant case-  
185 control expression differences show little overlap with genetic risk for the disorder.

186 In an earlier study of the epigenetic landscape of frontal cortex of patients with  
187 schizophrenia, we showed that DNA methylation levels in patients were closer to fetal  
188 methylation levels than to those of adult control samples<sup>17</sup>. Here we tested for analogous effects  
189 in the RNA-seq data related to the illness state. Every significant gene with differentially  
190 expressed features in the adult case-control analysis and replicated in the independent dataset  
191 showed evidence for developmental regulation across at least two expression feature types. We  
192 further found that the expression features normally more highly expressed in postnatal life  
193 tended to be more lowly expressed in patients compared to controls (max:  $p=3.24 \times 10^{-11}$ , min:  
194  $p=1.05 \times 10^{-70}$ , Figure 2C) and features more highly expressed in fetal life tended to be more  
195 highly expressed in patients with schizophrenia compared to controls regardless of  
196 summarization type (max:  $p=6.86 \times 10^{-33}$ , min:  $p < 10^{-100}$ , Figure 2D). Analogous analyses for  
197 developmental regulation of schizophrenia-associated features without adjusting for the RNA  
198 quality qSVs were significant in the opposite directions, namely that schizophrenia-associated  
199 changes were further from, rather than closer to, fetal expression levels, which would be  
200 predicted as an artifact of residual RNA quality confounding (as the quality of the samples rank  
201 as fetal > adult control > adult SZ, see Table S1). These results further converge on a role for  
202 genes changing during brain development and maturation in schizophrenia, specifically that  
203 both DNA methylation and expression levels in adult patients appear to reflect levels in the  
204 developing brain more strongly than do those of unaffected individuals. These results also  
205 underscore the risk of spurious findings based on uncorrected RNA quality confounding.

206

207 *Clinical enrichment of eQTL associations for schizophrenia*

208 In order to elucidate the RNA features associated with schizophrenia risk variants  
209 themselves, rather than LD regions, we first performed a genome-wide *cis* (<500kb) expression  
210 quantitative trait loci (eQTL) analysis within the 412 post-adolescent subjects (see Methods).  
211 We then replicated SNP-feature eQTL pairs in two independent datasets (CMC and GTEx) to  
212 form a significant and replicated set of high-confidence eQTLs (“core eQTLs”) to interrogate for  
213 clinical risk. Overall, we confirm widespread genetic control of expression in human brain  
214 (Figure 3A, Table S13, Table S14) which can be accessed by the research community via a  
215 user friendly browser at [eqtl.brainseq.org](http://eqtl.brainseq.org). The majority of these core eQTLs were largely gene-  
216 specific, consistent across both interrogated races (Results S5, Figure 3B), very proximal to the  
217 TSS of genes (Figure 3C), and expression of the majority of genes was associated with more  
218 than 1 LD-independent SNP. We further found the largest effect sizes on average for the  
219 junction and ER eQTLs (Figure 3D), and interestingly a large proportion of these eQTLs  
220 corresponded to unannotated transcriptional activity. While the majority of genes with features  
221 as eQTLs have multiple possible Ensembl transcript isoforms, 67.0% of exon eQTLs and 31.1%  
222 of junction eQTLs were specific to a single Ensembl transcript when multiple transcripts existed  
223 for a given gene. Together these eQTL results, based on analyses across multiple feature  
224 summarizations from RNA sequencing data, demonstrate more widespread genetic regulation  
225 of expression than previously reported, including extensive transcript specificity and regulation  
226 of unannotated sequence in the human brain. These observations offer novel insights into *cis*  
227 mechanisms of common variation in brain.

228 We next explored the landscape of eQTLs associated with genetic risk using the set of  
229 core eQTLs among the PGC2-significant risk SNPs. There were 46 (42.5%) risk SNPs  
230 significantly associated with expression levels of 764 nearby features at FDR < 1% significance  
231 (Table S15, of the 108/128 PGC2 “index” SNPs that were present in our data). This proportion  
232 of SNPs was highly significant ( $p=4.6 \times 10^{-9}$ ) relative to the 19.7% of all tested common variants  
233 with eQTL signal. These risk eQTL features mapped back to 134 Ensembl genes (and 116 gene  
234 symbols). Interestingly, many of these adult-identified eQTLs show similar genetic regulation in  
235 fetal brain, analogous to observations made among methylation quantitative trait loci (meQTLs)  
236 at these risk SNPs<sup>17,18</sup>. In addition, the majority of these genetic risk-associated expression  
237 features were developmentally regulated across the lifespan in our control samples (N=528,  
238 69.1%), suggesting that different developmental time periods may have different magnitudes of  
239 eQTL effects among these risk-associated expressed features. Even more strikingly, 57 genes  
240 (42.5%) having risk SNP eQTLs had shifting isoform usage across pre- and post-natal life, a  
241 highly enriched proportion relative to all expressed genes (9,205/43,046 genes with isoform  
242 shifts, OR=2.73,  $p=4.21 \times 10^{-9}$ ), further highlighting developmental relevance for schizophrenia  
243 genetic risk.

244

#### 245 Identifying risk transcripts through clinical and molecular convergence

246 In principle, transcripts with convergence of directionality of association with both genetic  
247 risk and with clinical illness are especially attractive as putative molecular mechanisms of illness  
248 and as candidates for designing pathogenic models. We therefore used allele information and

249 the corresponding effect estimates in the GWAS (odds ratio) and eQTL analyses (change in  
250 expression per allele copy) to test which of the expressed features that differentiated patients  
251 and controls were directionally consistent with the allelic directionality of genetic risk. In other  
252 words, if a given allele at a risk associated SNP is associated with increased expression of a  
253 nearby feature via the eQTL analysis, we tested whether expression of the same feature was  
254 more likely to be higher in patients compared to controls (Results S6, Figure 4A). Indeed, we  
255 found two-fold enrichment of this directional consistency between the GWAS, case-control, and  
256 FDR-significant eQTLs ( $p=4.2 \times 10^{-6}$ ). In order to reduce the chances of off-target eQTLs being  
257 driven by correlated expression features, we lastly retained SNP-feature associations that were  
258 at least half as significant on the  $\log_{10}$  scale as the best eQTL for each GWAS index SNP (e.g. if  
259 the best eQTL association for a risk SNP was  $p < 1 \times 10^{-10}$ , then eQTLs with  $p > 1 \times 10^{-5}$  were  
260 excluded).

261 This approach resulted in core eQTL signal across 34 GWAS loci with convergence of  
262 allele and illness state expression directionality (encompassing 59 genes across 231 features,  
263 Table S16). These are transcript features and genes that show consistent directionality of  
264 association of genetic risk alleles and of illness state, implicating these as particularly likely  
265 pathogenic factors underlying the GWAS loci. In the majority of these loci ( $N=22$ , 64.7%) the  
266 eQTLs represented a single Ensembl gene, nominating it as the most well supported “risk  
267 gene”, based on schizophrenia genetic risk coupled to expression features in the polyA+  
268 fraction of postmortem DLPFC (Figure 4 and Figure S9). Of the remaining 12 GWAS loci that  
269 did not associate with features in only a single gene, 6 (17.6%) were similarly associated with  
270 the expression of two nearby genes, which may indicate different candidate genes whose  
271 expression is driven by different chromosomal haplotypes (Table 2). The effects of the  
272 remaining risk SNPs were more difficult to untangle, each associating with similar significance  
273 levels with three ( $N=2$ ), four ( $N=3$ ) or seven ( $N=1$ ) genes. Finally, there were transcript-specific  
274 signals for many of the loci, including individual isoforms among multi-gene risk eQTLs. For  
275 example, there were 40 genes with transcript annotation (excluding gene- and region-level  
276 summarizations) and 25 genes contained features tagging single Ensembl transcripts (Table  
277 S17). This transcript specificity cautions that many gene count- or microarray-based approaches  
278 may miss important risk gene signals in eQTL analyses (see Discussion). These eQTL results  
279 highlight significant and independently-replicated risk-associated schizophrenia candidate  
280 genes and their specific transcripts that comprise links in the causative chain of schizophrenia in  
281 the human brain.

282

## 283 Discussion

284 We have explored the diverse landscape of expression correlates of schizophrenia risk  
285 and illness state in the postmortem human frontal cortex. Using deep RNA sequencing to define  
286 convergent measures of gene expression and early brain development, we identified  
287 widespread developmental regulation of transcription, including novel discoveries related to  
288 preferential isoform usage across brain development. These isoform “shifts” were associated  
289 with genetic risk for schizophrenia, and the directionality of dysregulation of developmentally



290 regulated features suggest a more fetal-like expression profile in patients with schizophrenia  
291 compared to controls. Our approach to transcript characterization, which included extensive  
292 characterization of unannotated sequence, revealed that many more schizophrenia risk  
293 associated SNPs are brain eQTLs than previously reported - many risk SNPs only associate  
294 with a single gene, or even a single transcript, and many of these adult-identified eQTLs show  
295 similar genetic regulation in the fetal brain. Lastly, we identified significant and replicated genes  
296 differentially expressed in patients with schizophrenia compared to unaffected controls using a  
297 new experiment-based statistical framework to estimate and reduce the effects of latent RNA  
298 degradation bias. Without this new approach to RNA quality adjustment, replication across  
299 datasets is markedly limited if not negligible, and the directionality of the association with  
300 developmental isoform shifts is anomalous. These data suggest a convergence of  
301 developmental regulation and genetic risk for schizophrenia that appears relatively stable in  
302 patients ascertained at death, following decades of illness after diagnosis. We previously  
303 observed analogous stability of epigenetic marks highlighting prenatal life in adult patients with  
304 schizophrenia<sup>17</sup>, suggesting that both genetic and environmental risk factors implicated in  
305 schizophrenia illness involve early developmental events which are still observable in the brain  
306 tissue of adult individuals who have been ill for many years.

307 While our approach utilizing convergent expression features – genes, exons, transcripts,  
308 junctions, and expressed regions – results in more complicated data processing and analysis, it  
309 can potentially cast a wider net in the search for valid biological signals in RNA sequencing  
310 datasets. Using all convergent features overcomes the limitations related to any given feature  
311 summarization, including the inability to measure and interrogate unannotated or novel  
312 transcribed sequence using gene and exon counts, and the difficulties in full transcript assembly  
313 from short sequencing reads<sup>19</sup>. We note that both quantifying and analyzing splice junctions,  
314 and also transcript-level data, rely on junction-spanning reads for statistical power. In our data,  
315 there were approximately 3 times (IQR: 2.86-3.24) more reads available by gene/exon counting  
316 approaches than those that contain splice junctions, likely explaining why gene counts  
317 discovered more differentially expressed genes in the schizophrenia diagnosis analyses. Two  
318 relatively new approaches utilized here – direct quantification and statistical analyses of splice  
319 junction counts and expressed regions – can identify differential expression signal when it is  
320 outside of the annotated transcriptome. The junction-level approach can also identify previously  
321 uncharacterized novel transcribed sequence, which we replicated in other large publicly  
322 available datasets, as well as delineate individual transcripts or classes of transcripts that share  
323 a particular splice junction, and as read lengths increase, the proportion of reads containing  
324 splice junctions will increase, making junction- and transcript-based approaches even more  
325 powerful, including those recently developed to identify splicing QTLs<sup>20</sup>.

326 Our analysis of RNA-seq data identified widespread shifts in preferential isoform use  
327 across brain development, which would have been impossible to identify using only gene-level  
328 data and incomplete with only exon-level data (Figure 4). The genes with these isoform shifts  
329 were significantly enriched for neurodevelopmental and cellular signaling processes, and as well  
330 as for genes in regions of genetic risk for schizophrenia. A prevalent hypothesis suggests that  
331 schizophrenia is a neurodevelopmental disorder that arises because of altered connectivity and  
332 plasticity in the early assembly of relevant neural circuits<sup>1</sup>, and the potential convergence of

333 genetic risk with developing signaling processes across human brain development should point  
334 to specific candidate molecular disruptions occurring during the wiring of the fetal brain. Indeed,  
335 inefficient or disrupted signaling and tuning is thought to underlie the expression of illness in the  
336 adult brain <sup>1</sup>, and the most successful therapeutics work through improving these processes<sup>14</sup>.  
337 Consistent with this hypothesis, we find evidence for differences in the expression of genes  
338 coding for subunits of ion channels in the cortices of patients with schizophrenia compared to  
339 controls. We observed significant differential expression of both voltage-gated (*KCNA1*, *KCNC3*,  
340 *KCNK1*, *KCNN1*, *SCN9A*) and ligand gated ion channels (*GRIN3A*, *GABRA5*, *GABRB3*),  
341 transporters (*SLC16A2*, *ALC25A33*, *SLC26A11*, *SLC35F2*, *SLC7A3*), and ion channel auxiliary  
342 subunits (*KCNIP3*, *SCN1B*), supporting other evidence that the clinical phenomenology of  
343 schizophrenia is associated with altered neuronal excitability <sup>21</sup>. While these findings implicating  
344 basic mechanisms of cortical circuit dynamics may underlie fundamental aspects of the clinical  
345 disorder, the possibility that they are driven by the effects of pharmacological treatment and are  
346 thus state dependent epiphenomena cannot be excluded.

347 Our eQTL analyses are among the largest and most comprehensive to date in human  
348 brain tissue, requiring stringent genome-wide significance and independent replication, and offer  
349 additional insights into the genetic regulation of RNA expression levels. We show that over half  
350 of the genes with eQTL signals are associated with three or more nearby LD-independent  
351 SNPs, suggesting a potential mechanism to explain how expression levels at the population-  
352 level are relatively normally distributed while so many genes show distinct eQTL signals. Our  
353 data also suggest more widespread regulation of specific transcript isoforms, which we were  
354 able to identify using exon- and junction-level analyses. This transcript-specific genetic  
355 regulation was particularly prevalent among schizophrenia risk variants, where 62.5% of loci  
356 containing multiple transcripts showed clinically- and molecularly-consistent eQTL signal to a  
357 single Ensembl transcript isoform. Overall, we have identified many more eQTLs to genome-  
358 wide significant schizophrenia risk variants – 42.5% - than previously reported, experimentally  
359 implicating far more potential “risk” genes within these loci than previously characterized.

360 These eQTL associations within the genome-wide significant schizophrenia loci  
361 generate novel putative biological mechanisms underlying risk for the disorder. We highlight 34  
362 GWAS loci that contain significant eQTLs that show convergence of consistent altered  
363 expression across both genetic risk and case status in the human brain. These loci often point  
364 to individual “risk” genes or even more specific “risk” transcripts that can represent targetable  
365 entry points for more focused cellular assays and model organism work to better characterize  
366 schizophrenia risk mechanisms. Moreover, observation of convergence in directionality of  
367 molecular association with genetic risk and clinical state identifies a compelling strategy and  
368 directionality for target rescue, specifically to increase or decrease the function of the target  
369 transcript(s) and downstream effectors. Focusing solely on increased or decreased expression  
370 in brains of patients compared to controls, without considering genetic risk variants and their  
371 regulation of local gene expression, will likely predominantly highlight molecular changes  
372 resulting from the schizophrenia illness state, as we suggest with consistent down-regulation of  
373 ion channels.

374 We stress the priority of identifying the most relevant cellular consequences of genetic  
375 risk, which we view as production of particular isoforms with predicted directionality, rather than  
376 trying to identify “causal” mutations tagged by “marker” risk SNPs from the GWAS. We suggest  
377 that identifying convergence between genetic risk and potential molecular consequences of the  
378 disorder is likely to result in better, or at least more consistent support for, targets for drug  
379 discovery efforts.

380

381

## 382 **Author Contributions**

383 A.E.J – performed primary data processing and analyses, led the writing of the manuscript

384 R.E.S – contributed to data analysis and writing of the manuscript

385 J.H.S., R.T. , Y.G. – performed RNA sequencing data generation (RNA extraction, library  
386 preparation, and sequencing) and QC analyses

387 L.C.T.,J.T.L – performed region-level data generation and assisted in data analysis and  
388 interpretation

389 T.K.T.,S.X.,J.Q.,C.C.,B.J.M., A.C.,N.B.,BrainSeq – provided feedback on manuscript and  
390 contributed to data analyses and interpretations on eQTL analyses.

391 B.U. – created user-friendly database of eQTLs

392 A.D.S., T.M.H.,J.E.K.- collected, consented, characterized, and dissected human brain tissue

393 D.R.W. – designed and oversaw the research project, wrote the manuscript

394 Tony Kam-Thong is employed by F. Hoffmann-La Roche

395 Hualin S Xi and Jie Quan are employees of Pfizer Inc.

396 Alan Cross, and Nicholas J.Brandon were full time employees and shareholders in AstraZeneca  
397 at the time these studies were conducted.

398 The remaining authors declare no competing financial interests.

399

400 **Data Availability:** sequencing reads and genotype data are available through SRA and dbGaP  
401 at accession numbers: [TBD] following publication.

402

## 403 **Acknowledgements:**

404 We thank Dr. Ronald Zielke, Robert D. Vigorito, and Robert M. Johnson of the National Institute  
405 of Child Health and Human Development Brain and Tissue Bank for Developmental Disorders

406 at the University of Maryland for their provision of fetal, child, and adolescent brain specimens;  
407 This work was supported by the funding from Lieber Institute for Brain Development and the  
408 Maltz Research Laboratories. The work was partially supported by R21MH109956 to A.E.J.  
409 L.C.T was supported by Consejo Nacional de Ciencia y Tecnología México 351535.

410 The Genotype-Tissue Expression (GTEx) Project was supported by the [Common Fund](#) of the  
411 Office of the Director of the National Institutes of Health. Additional funds were provided by the  
412 NCI, NHGRI, NHLBI, NIDA, NIMH, and NINDS. Donors were enrolled at Biospecimen Source  
413 Sites funded by NCI\SAIC-Frederick, Inc. (SAIC-F) subcontracts to the National Disease  
414 Research Interchange (10XS170), Roswell Park Cancer Institute (10XS171), and Science Care,  
415 Inc. (X10S172). The Laboratory, Data Analysis, and Coordinating Center (LDACC) was funded  
416 through a contract (HHSN268201000029C) to The Broad Institute, Inc. Biorepository operations  
417 were funded through an SAIC-F subcontract to Van Andel Institute (10ST1035). Additional data  
418 repository and project management were provided by SAIC-F (HHSN261200800001E). The  
419 Brain Bank was supported by a supplements to University of Miami grants DA006227 &  
420 DA033684 and to contract N01MH000028. Statistical Methods development grants were made  
421 to the University of Geneva (MH090941 & MH101814), the University of Chicago (MH090951,  
422 MH090937, MH101820, MH101825), the University of North Carolina - Chapel Hill (MH090936  
423 & MH101819), Harvard University (MH090948), Stanford University (MH101782), Washington  
424 University St Louis (MH101810), and the University of Pennsylvania (MH101822). The data  
425 used for the analyses described in this manuscript were obtained from [dbGaP](#) accession  
426 number [phs000424.v6.p1](#) on October 6, 2015.

427 Data were generated as part of the CommonMind Consortium supported by funding from  
428 Takeda Pharmaceuticals Company Limited, F. Hoffman-La Roche Ltd and NIH grants  
429 R01MH085542, R01MH093725, P50MH066392, P50MH080405, R01MH097276, RO1-MH-  
430 075916, P50M096891, P50MH084053S1, R37MH057881 and R37MH057881S1,  
431 HHSN271201300031C, AG02219, AG05138 and MH06692. Brain tissue for the study was  
432 obtained from the following brain bank collections: the Mount Sinai NIH Brain and Tissue  
433 Repository, the University of Pennsylvania Alzheimer's Disease Core Center, the University of  
434 Pittsburgh NeuroBioBank and Brain and Tissue Repositories and the NIMH Human Brain  
435 Collection Core. CMC Leadership: Pamela Sklar, Joseph Buxbaum (Icahn School of Medicine  
436 at Mount Sinai), Bernie Devlin, David Lewis (University of Pittsburgh), Raquel Gur, Chang-Gyu  
437 Hahn (University of Pennsylvania), Keisuke Hirai, Hiroyoshi Toyoshiba (Takeda  
438 Pharmaceuticals Company Limited), Enrico Domenici, Laurent Essioux (F. Hoffman-La Roche  
439 Ltd), Lara Mangravite, Mette Peters (Sage Bionetworks), Thomas Lehner, Barbara Lipska  
440 (NIMH).

441 Members of the BrainSeq consortium include: Christian R. Schubert, Patricio O'Donnell, Jie  
442 Quan, Jens R. Wendland, Hualin S. Xi, Ashley R. Winslow, Enrico Domenici, Laurent Essioux,  
443 Tony Kam-Thong, David C. Airey, John N. Calley, David A. Collier, Hong Wang, Brian  
444 Eastwood, Philip Ebert, Yushi Liu, Laura Nisenbaum, Cara Ruble, James E. Scherschel, Ryan  
445 Matthew Smith, Hui-Rong Qian, Kalpana Merchant, Michael Didriksen, Mitsuyuki Matsumoto,  
446 Takeshi Saito, Nicholas J. Brandon, Alan J. Cross, Qi Wang, Hussein Manji, Hartmuth Kolb,

447 Maura Furey, Wayne C. Drevets, Joo Heon Shin, Andrew E. Jaffe, Yankai Jia, Richard E.  
448 Straub, Amy Deep-Soboslay, Thomas M. Hyde, Joel E. Kleinman, Daniel R. Weinberger

449

## 450 **Figure Legends**

451 **Figure 1:** Developmental regulation of expression. (A) Principal component #1 of the gene-level  
452 expression data versus age; PCW: post-conception weeks, remaining ages are in years. (B)  
453 Expression features fall into two main development regulation signatures, increasing in  
454 expression from fetal to postnatal life (orange) or decreasing from fetal to postnatal life (blue). Y-  
455 axis is Z-scaled expression (to standard normal), dark lines represent median expression levels,  
456 and confidence bands represent 25<sup>th</sup>-75<sup>th</sup> percentiles of expression levels for each class of  
457 features. (C) KEGG pathways enriched for genes with isoform shifts, stratified by which feature  
458 type identified the gene as having a switch. Coloring/scaling represents  $-\log_{10}(\text{FDR})$  for gene  
459 set enrichment. Analogous data for GO gene sets (biological processes, BP, and molecular  
460 function, MF) are available in Table S6. DER: differentially expressed region. Enrichment  
461 analyses for isoform shift genes among PGC2 schizophrenia GWAS risk loci with exon and  
462 junction counts using both (D) parametric p-values) and (E) permutation-based p-values. OR:  
463 odds ratio.

464 **Figure 2:** Differential expression comparing patients with schizophrenia to controls. (A)  
465 Histogram of fold changes of the diagnosis effect of those features that were significant and  
466 independently replicated, colored by feature type. (B) Gene set analyses of genes with  
467 decreased expression in patients compared to controls by feature type. Coloring/scaling  
468 represents  $-\log_{10}(\text{FDR})$  for gene set enrichment. Significant directional effects of developmental  
469 regulation among diagnosis-associated features for those features that (C) increased and (D)  
470 decreased across development (i.e. those features shown in Figure 1B). P-values provided for  
471 Wilcoxon rank sign test for those features developmentally regulated among case-control  
472 differences to those not developmentally regulated.

473 **Figure 3:** Expression quantitative trait loci (eQTL) in the human brain. (A) Table summarizing  
474 eQTL results across the five feature summarization types (gene, exon, transcript, junction and  
475 expressed region). Bonf: Bonferroni-adjusted p-value, Ens: Ensembl, Sym: Symbol, IQR:  
476 interquartile range, 25<sup>th</sup>-75<sup>th</sup> percentiles, bp = base pairs, kb = kilobases. (B) Similar  
477 standardized effect sizes (T-statistics) for eQTLs identified in full sample within just Caucasian  
478 (CAUC) and African American (AA) computed separately, here using exon-level eQTL results.  
479 (C) Histogram of the distance of the most significant SNP to each eQTL expression feature. (D)  
480 Boxplots of the effect sizes (absolute fold changes per minor allele copy) stratified by feature  
481 type.

482 **Figure 4:** Clinical enrichment of schizophrenia risk. (A) Image describing enforcement of  
483 directional consistency between GWAS, eQTL, and case-control differences. We highlight  
484 example eQTLs to GWAS-positive variants among annotated exons in (B) *SRR* and (C) *STAT6*,  
485 as well as unannotated expressed features, for example an intronic region in (D) *HSPD1*  
486 */HSPE1*, shown as a star in (E), and a junction linked to (F) only one annotated exon of

487 IMMP2L, shown as a bar in (G). In panels E and G, dark blue: exon, light blue: intron;  
488 coordinates relative to hg19.

489 **Tables**

| Number | Datasets | Transcript Class |             |              |             |
|--------|----------|------------------|-------------|--------------|-------------|
|        |          | In Ensembl       | Exon Skip   | Alt Boundary | Novel       |
| 251557 | Neither  | 2680(1.3%)       | 118(1.4%)   | 315(1.6%)    | 4613(24.8%) |
|        | Geuvadis | 134(0.1%)        | 3(0%)       | 14(0.1%)     | 116(0.6%)   |
|        | GTEX     | 7883(3.8%)       | 1257(14.8%) | 4312(22.3%)  | 6768(36.3%) |
|        | Both     | 194342(94.8%)    | 7136(83.8%) | 14730(76%)   | 7136(38.3%) |

490

491 **Table 1:** splice junction annotation and characterization in GTEx and GEUVADIS for moderately  
492 expressed junctions (mean reads per 80M mapped reads, RP80M > 1). Each column  
493 represents a 2x2 table for presence of identified junctions in 495 DLPFC samples in two  
494 independent polyA+ datasets.

495

496

| GWAS Rank | Risk Direction | Gene                       | Feature Type | Best p-value |
|-----------|----------------|----------------------------|--------------|--------------|
| 3         | UP             | <i>AS3MT</i>               | E            | 6.73E-40     |
| 3         | UP             | <i>BORCS7</i> <sup>+</sup> | G,E,R        | 9.23E-34     |
| 3         | UP             | <i>AS3MT</i> <sup>*</sup>  | J            | 9.57E-25     |
| 7         | DOWN           | <i>FTSJ2</i>               | E,J,G,R      | 2.64E-07     |
| 8         | DOWN           | <i>GNL3LP1</i>             | E            | 3.11E-10     |
| 8         | DOWN           | <i>ERCC8</i>               | E,R          | 6.22E-10     |
| 9         | DOWN           | <i>ARL6IP4</i>             | J            | 4.12E-36     |
| 16        | UP             | <i>IMMP2L</i>              | J,T          | 6.04E-10     |
| 17        | UP             | <i>SNX19</i>               | J            | 9.77E-07     |
| 23        | UP             | <i>C2orf82</i>             | T            | 6.33E-06     |
| 24        | DOWN           | <i>NRGN</i>                | R            | 3.5E-05      |
| 24        | DOWN           | <i>VSIG2</i>               | R            | 8.6E-05      |
| 31        | UP             | <i>GOLGA2P7</i>            | E,R          | 5.12E-30     |
| 31        | UP             | <i>GOLGA6L5P</i>           | R            | 8.13E-24     |
| 33        | UP             | <i>HSPD1</i>               | R            | 3.34E-14     |
| 34        | UP             | <i>XPNPEP3</i>             | E,J,R        | 3.63E-08     |
| 42        | DOWN           | <i>PCCB</i>                | G,E,R        | 2.95E-11     |
| 47        | DOWN           | <i>SRR</i>                 | E,G,R,J      | 2.1E-12      |
| 51        | DOWN           | <i>GATAD2A</i>             | R            | 2.51E-08     |
| 51        | DOWN           | <i>NDUFA13</i>             | J            | 9.36E-06     |
| 52        | UP             | <i>VPS45</i>               | R            | 1.88E-16     |
| 57        | UP             | <i>RERE</i>                | E            | 7.7E-07      |
| 73        | UP             | <i>CTNNA1</i>              | E            | 5.18E-07     |
| 84        | UP             | <i>GPM6A</i>               | R            | 3.12E-06     |
| 94        | UP             | <i>PRMT7</i>               | R,J,E        | 5.37E-09     |
| 94        | UP             | <i>TSNAXIP1</i>            | G,R          | 8.78E-06     |
| 96        | DOWN           | <i>ATPAF2</i>              | E            | 4.58E-07     |
| 103       | UP             | <i>STAT6</i>               | E,J          | 1.71E-07     |
| 106       | DOWN           | <i>SOX2-OT</i>             | R            | 8.18E-12     |
| 106       | DOWN           | <i>RP11-275H4.1</i>        | T            | 2.62E-06     |
| 117       | DOWN           | <i>FANCL</i>               | E,R          | 2.45E-17     |
| 120       | DOWN           | <i>BRINP2</i>              | R            | 6.7E-06      |
| 121       | UP             | <i>CD46</i>                | E,R,G,J      | 1.57E-37     |
| 125       | UP             | <i>IRF3</i>                | J,E          | 4.51E-10     |

497 **Table 2:** eQTL and clinical directional consistent signal around the GWAS risk variants for  
498 schizophrenia. GWAS rank is relative to Supplementary Table 2 in Ripke et al<sup>2</sup>. Direction refers  
499 to whether schizophrenia risk represents increased or decreased expression of the particular  
500 features. Feature type indicates which of (G)enes, (E)xons, (J)unctions, (T)ranscripts, or  
501 expressed (R)egions showed eQTL association to the risk SNP. The best p-value for the risk  
502 SNP to features in each gene are recorded in the last column. <sup>+</sup>*C10orf32* in Ensembl v75 but  
503 updated in later versions; <sup>\*</sup> unannotated junction found to tag a new transcript of the gene,  
504 *AS3MT*<sup>d2d3</sup>, that has been more fully characterized by Li et al<sup>22</sup>.

505

506

## 507 References

- 508 1 Weinberger, D. R. & Levitt, P. in *Schizophrenia* 393-412 (Wiley-Blackwell, 2011).
- 509 2 Ripke, S. *et al.* Biological insights from 108 schizophrenia-associated genetic loci.  
510 *Nature* **511**, 421-+, doi:10.1038/nature13595 (2014).
- 511 3 Maurano, M. T. *et al.* Systematic localization of common disease-associated variation in  
512 regulatory DNA. *Science* **337**, 1190-1195, doi:10.1126/science.1222794 (2012).
- 513 4 Perteau, M. *et al.* StringTie enables improved reconstruction of a transcriptome from  
514 RNA-seq reads. *Nature biotechnology* **33**, 290-295, doi:10.1038/nbt.3122 (2015).
- 515 5 Nellore, A. *et al.* Human splicing diversity across the Sequence Read Archive. *bioRxiv*,  
516 doi:10.1101/038224 (2016).
- 517 6 Collado Torres, L. *et al.* Flexible expressed region analysis for RNA-seq with derfinder.  
518 *Nucleic Acids Research In Press.*, doi:10.1101/015370 (2016).
- 519 7 Jaffe, A. E. *et al.* Developmental regulation of human cortex transcription and its clinical  
520 relevance at single base resolution. *Nat Neurosci* **18**, 154-161, doi:10.1038/nn.3898  
521 (2015).
- 522 8 Tan, W. *et al.* Molecular cloning of a brain-specific, developmentally regulated  
523 neuregulin 1 (NRG1) isoform and identification of a functional promoter variant  
524 associated with schizophrenia. *The Journal of biological chemistry* **282**, 24343-24351,  
525 doi:10.1074/jbc.M702953200 (2007).
- 526 9 Kao, W. T. *et al.* Common genetic variation in Neuregulin 3 (NRG3) influences risk for  
527 schizophrenia and impacts NRG3 expression in human brain. *Proceedings of the*  
528 *National Academy of Sciences of the United States of America* **107**, 15619-15624,  
529 doi:10.1073/pnas.1005410107 (2010).
- 530 10 Tao, R. *et al.* Expression of ZNF804A in human brain and alterations in schizophrenia,  
531 bipolar disorder, and major depressive disorder: a novel transcript fetally regulated by  
532 the psychosis risk variant rs1344706. *JAMA psychiatry* **71**, 1112-1120,  
533 doi:10.1001/jamapsychiatry.2014.1079 (2014).
- 534 11 Hyde, T. M. *et al.* Expression of GABA signaling molecules KCC2, NKCC1, and GAD1 in  
535 cortical development and schizophrenia. *The Journal of neuroscience : the official*  
536 *journal of the Society for Neuroscience* **31**, 11088-11095,  
537 doi:10.1523/JNEUROSCI.1234-11.2011 (2011).
- 538 12 Birnbaum, R., Jaffe, A. E., Hyde, T. M., Kleinman, J. E. & Weinberger, D. R. Prenatal  
539 expression patterns of genes associated with neuropsychiatric disorders. *The American*  
540 *journal of psychiatry* **171**, 758-767, doi:10.1176/appi.ajp.2014.13111452 (2014).
- 541 13 Buchanan, R. W. & Carpenter, W. T. Domains of psychopathology: an approach to the  
542 reduction of heterogeneity in schizophrenia. *The Journal of nervous and mental disease*  
543 **182**, 193-204 (1994).
- 544 14 Winterer, G. & Weinberger, D. R. Genes, dopamine and cortical signal-to-noise ratio in  
545 schizophrenia. *Trends in neurosciences* **27**, 683-690, doi:10.1016/j.tins.2004.08.002  
546 (2004).
- 547 15 Jaffe, A. E. *et al.* A framework for RNA quality correction in differential expression  
548 analysis. *bioRxiv*, doi:10.1101/074245 (2016).
- 549 16 Schizophrenia Working Group of the Psychiatric Genomics, C. Biological insights from  
550 108 schizophrenia-associated genetic loci. *Nature* **511**, 421-427,  
551 doi:10.1038/nature13595 (2014).
- 552 17 Jaffe, A. E. *et al.* Mapping DNA methylation across development, genotype and  
553 schizophrenia in the human frontal cortex. *Nature neuroscience* **19**, 40-47,  
554 doi:10.1038/nn.4181 (2016).



- 555 18 Hannon, E. *et al.* Methylation QTLs in the developing brain and their enrichment in  
556 schizophrenia risk loci. *Nature neuroscience* **19**, 48-54, doi:10.1038/nn.4182 (2016).
- 557 19 Steijger, T. *et al.* Assessment of transcript reconstruction methods for RNA-seq. *Nature*  
558 *methods* **10**, 1177-1184, doi:10.1038/nmeth.2714 (2013).
- 559 20 Li, Y. I. *et al.* RNA splicing is a primary link between genetic variation and disease.  
560 *Science* **352**, 600-604, doi:10.1126/science.aad9417 (2016).
- 561 21 Uhlhaas, P. J. & Singer, W. Abnormal neural oscillations and synchrony in  
562 schizophrenia. *Nature reviews. Neuroscience* **11**, 100-113, doi:10.1038/nrn2774 (2010).
- 563 22 Li, M. *et al.* A human-specific AS3MT isoform and BORCS7 are molecular risk factors in  
564 the 10q24.32 schizophrenia-associated locus. *Nature medicine*, doi:10.1038/nm.4096  
565 (2016).

566

567

## 568 **Methods**

569

### 570 Postmortem brain samples

571 Post-mortem human brain tissue was obtained by autopsy primarily from the Offices of the Chief  
572 Medical Examiner of the District of Columbia, and of the Commonwealth of Virginia, Northern  
573 District, all with informed consent from the legal next of kin (protocol 90-M-0142 approved by the  
574 NIMH/NIH Institutional Review Board). Additional post-mortem fetal, infant, child and adolescent  
575 brain tissue samples were provided by the National Institute of Child Health and Human  
576 Development Brain and Tissue Bank for Developmental Disorders (<http://www.BTBank.org>)  
577 under contracts NO1-HD-4-3368 and NO1-HD-4-3383. The Institutional Review Board of the  
578 University of Maryland at Baltimore and the State of Maryland approved the protocol, and the  
579 tissue was donated to the Lieber Institute for Brain Development under the terms of a Material  
580 Transfer Agreement. Clinical characterization, diagnoses, and macro- and microscopic  
581 neuropathological examinations were performed on all samples using a standardized paradigm,  
582 and subjects with evidence of macro- or microscopic neuropathology were excluded. Details of  
583 tissue acquisition, handling, processing, dissection, clinical characterization, diagnoses,  
584 neuropathological examinations, RNA extraction and quality control measures were described  
585 previously in Lipska, et al.<sup>23</sup>. The Brain and Tissue Bank cases were handled in a similar  
586 fashion (<http://medschool.umaryland.edu/BTBank/ProtocolMethods.html>). Antipsychotic use  
587 was measured using toxicology at time of death.

588

### 589 RNA extraction and sequencing

590 Post-mortem tissue homogenates of dorsolateral prefrontal cortex grey matter (DLPFC)  
591 approximating BA46/9 in postnatal samples and the corresponding region of PFC in fetal  
592 samples were obtained from all subjects. Total RNA was extracted from ~100 mg of tissue using  
593 the RNeasy kit (Qiagen) according to the manufacturer's protocol. The poly-A containing RNA  
594 molecules were purified from 1 µg DNase treated total RNA and sequencing libraries were  
595 constructed using the Illumina TruSeq® RNA Sample Preparation v2 kit. Sequencing  
596 indices/barcodes were inserted into Illumina adapters allowing samples to be multiplexed in

597 across lanes in each flow cell. These products were then purified and enriched with PCR to  
598 create the final cDNA library for high throughput sequencing using an Illumina HiSeq 2000 with  
599 paired end 2x100bp reads.

600

## 601 RNA sequencing data processing

602

603 The Illumina Real Time Analysis (RTA) module performed image analysis, base calling, and the  
604 BCL Converter (CASAVA v1.8.2), generating FASTQ files containing the sequencing reads.

605 These reads were aligned to the human genome (UCSC hg19 build) using the spliced-read  
606 mapper TopHat (v2.0.4) using the reference transcriptome to initially guide alignment, based on  
607 known transcripts of the previous Ensembl build GRCh37.67 (the “-G” argument in the  
608 software) <sup>24</sup>. We achieved a median of 85.3 million (IQR: 71.7M-111.2M) aligned reads per  
609 sample (see Table S1).

610

611 We characterized the transcriptomes of these 495 samples using five convergent  
612 measurements of expression (“feature summarizations”)– (1) gene and (2) exon counts, and (3)  
613 transcript-level quantifications that rely on existing gene annotation, and two annotation-  
614 agnostic approaches we have developed that are determined solely from the read alignments –  
615 (4) read coverage supporting exon-exon splice junctions (e.g. coordinates of potentially intronic  
616 sequence that are spliced out of mature transcripts captured by a single read) and (5) read  
617 coverage overlapping each base in each sample which we have summarized into contiguous  
618 “expressed regions” (ERs, see Methods, Figure S1). These last three measurements generate  
619 expression for features of interest that can “tag” elements of transcripts in the data that are not  
620 constrained by limitations or incompleteness of existing annotation, and the counts for these  
621 features can then be directly used for differential expression analysis.

622 1. Gene counts were generated using the featureCounts tool<sup>25</sup> based on the more recent  
623 Ensembl v75, which was the last stable release for the hg19 genome build, using single end  
624 read counting [featureCounts -a \$GTF -o \$OUT \$BAM]. We converted counts to RPKM  
625 values using the total number of aligned reads across the autosomal and sex chromosomes  
626 (dropping reads mapping to the mitochondria chromosome).

627 2. Exon counts were also generated using the featureCounts tool<sup>25</sup> based on the more recent  
628 Ensembl v75, using single end read counting, and allowing reads to be assigned to multiple  
629 exons (e.g. those with splice junctions) [featureCounts -O -f -a \$GTF -o \$OUT \$BAM]. We  
630 converted counts to RPKM values using the total number of aligned reads across the  
631 autosomal and sex chromosomes (dropping reads mapping to the mitochondria  
632 chromosome).

633 3. Junction counts were generated by first filtering the TopHat BAM file to primary alignments  
634 only [samtools view -bh -F 0x100 \$BAM > \$NEWBAM ] and regtools <sup>26</sup> was used to extract  
635 analogous junction information (coordinates and number of reads supporting) as the TopHat  
636 output. We found that native TopHat output (junctions.bed) was based on both primary and  
637 secondary alignments, which could influence the degree of potentially novel splice junctions.  
638 We used a modified version of TopHat’s “bed\_to\_juncs” program to retain the number of  
639 supporting reads (in addition to returning the coordinates of the spliced sequence, rather

640 than the maximum fragment range), and used R code (see Supplementary Code) to  
641 combine and annotate these junctions across all samples. We annotated identified splice  
642 junctions using Ensembl v75 – while the initial alignment was guided by Ensembl v67, novel  
643 junctions, by definition, are identified in the second genome alignment, rather than the initial  
644 guided transcriptome alignment step. We converted counts to “RP80M” values, or “reads per  
645 80 million mapped” using the total number of aligned reads across the autosomal and sex  
646 chromosomes (dropping reads mapping to the mitochondria chromosome), which can be  
647 interpreted as the number of reads supporting the junction in an average library size (we  
648 were targeting 80M reads in the sequencing). Most junctions were lowly expressed in our  
649 homogenate tissue, with fewer than 1 average normalized supporting read (N=3,330,642;  
650 92.98%) including approximately half unique to a single individual (N= 1,779,241, 49.67%).  
651 4. Transcripts were assembled using StringTie<sup>4</sup> (version 1.1.2) guided by Ensembl v75  
652 annotation within each sample [stringtie \$BAM -o \$OUT -G \$GTF]. We then used  
653 “CuffMerge”<sup>27</sup> to merge all assembled transcriptomes across all samples, and then re-  
654 quantified the expression of each transcript isoform in each sample again using StringTie  
655 to this global set of transcripts [stringtie \$BAM -B -e -o \$OUT -G \$GTF\_ALL] to have  
656 expression measurements on the same transcripts across all samples. We then used the  
657 “ballgown” tool<sup>28</sup> to merge all assembled and quantified transcripts across all samples (N=  
658 733,339), and used liberal filtering to remove lowly or uniquely expressed transcripts (mean  
659 FPKM > 0.025), resulting in 188,578 transcripts across the 495 samples.  
660 5. Expressed regions (ERs) were calculated using the “derfinder” R Bioconductor package<sup>6</sup>  
661 using a cutoff of 5 normalized (to 80M reads) read coverage, which identified 389,797 ERs.  
662 We retained the 275,885 ERs that were at least 12 basepairs, and annotated the ERs to  
663 Ensembl v75.

#### 664 Genotype data processing

665 SNP genotyping with HumanHap650Y\_V3 (N=135), Human 1M-Duo\_V3 (N=357), and Omni5  
666 (N=3) BeadChips (Illumina, San Diego, CA) was carried out according to the manufacturer’s  
667 instructions with DNA extracted from cerebellar tissue. Genotype data were processed and  
668 normalized with the crlmm R/Bioconductor package<sup>29</sup> separately by platform. Genotype  
669 imputation was performed on high-quality observed genotypes (removing low quality and rare  
670 variants) using the prephasing/imputation stepwise approach implemented in IMPUTE2<sup>30</sup> and  
671 Shape-IT<sup>31</sup>, with the imputation reference set from the full 1000 Human Genomes Project Phase  
672 3 data set, separately by platform. We retained common SNPs (MAF > 5%) that were present in  
673 the majority of samples (missingness < 10%) that were in Hardy Weinberg equilibrium (at  $p >$   
674  $1 \times 10^{-6}$ ) using the Plink<sup>32</sup> version 1.9 tool kit [ plink --bfile \$BFILE --geno 0.1 --maf 0.05 --hwe  
675 0.000001 ]. We then identified linkage disequilibrium (LD)-independent SNPs to use in genome-  
676 wide clustering of samples and in the number of independent eQTL tests performed [ plink -  
677 bfile \$BFILE --indep 100 10 1.25 ]. Multidimensional scaling (MDS) was performed on the  
678 autosomal LD-independent construct genomic ancestry components on each sample, which can  
679 be interpreted as quantitative levels of ethnicity – the first component separated the Caucasian  
680 and African American samples. This processing and quality control steps resulted in 7,421,423  
681 common variants in this dataset of 495 subjects.

682  
683

## 684 Risk polygene score (RPS) analysis

685 We computed risk polygene scores (RPS) using the allelic dosage files following imputation  
686 described above and the SNPs from provided by the PGC to the Lieber Institute that did not  
687 contain completely different clinical subjects used in the GWAS<sup>2</sup>. We considered expression  
688 associations at the gene, exon and junction-level to the RPS scores from the first 5 clinical SNP  
689 sets, corresponding to GWAS p-value thresholds of  $p < 5e-8$  (s1),  $p < 1e-6$  (s2),  $p < 1e-4$  (s3),  $p$   
690  $< 0.001$  (s4), and  $p < 0.01$  (s5) – subsequent SNP sets were ignored due to clinical risk  
691 plateauing at s5. We also focused only on Caucasian individuals (96 cases, 113 controls), as  
692 the s5 RPS was increased in patients relative to controls in this sample ( $p=3.2 \times 10^{-5}$ ), but did not  
693 differ among African Americans ( $p=0.9$ ). Within each expression feature type, we modeled  
694 expression levels as a function of each RPS set (s1-s5), adjusting for 3 MDS components of the  
695 genotype data, sex, and the first  $K$  principal components (PCs) of the normalized expression  
696 features, where  $K$  was calculated using the Buja and Eyuboglu permutation-based algorithm<sup>33</sup> in  
697 the “sva” Bioconductor package<sup>34</sup>. The resulting p-values of RPS on expression, adjusting for  
698 the above factors, were subject to false discovery rate (FDR) control to account for multiple  
699 testing.

700

## 701 Public data processing

702 *GTEX*: Raw RNA-seq reads from all brain samples with corresponding genotype data were  
703 downloaded from SRA and aligned to the genome using TopHat2<sup>24</sup> (version 2.0.14) using the  
704 iGenomes transcriptome and genome annotations based on hg19. As above, featureCounts<sup>25</sup>  
705 was used to quantify expression of genes and exons relative to Ensembl v75, and junctions  
706 were quantified with regtools<sup>26</sup> as above. We used StringTie with the assembled merged GTF  
707 from the LIBD DLPFC samples on the GTEX BAM files to quantify the same transcripts, and  
708 used bwtool to quantify the coverage of the same expressed regions from the GTEX brain  
709 samples. Genotype data from the two platforms (Illumina Omni 5M and 2.5M) were imputed  
710 separately as described above and merged into a single plink<sup>32</sup> set.

711 *GEUVADIS*: Raw RNA-seq reads from all LCL samples were downloaded from SRA and  
712 aligned to the genome using TopHat2<sup>24</sup> (version 2.0.9) using the iGenomes transcriptome and  
713 genome annotations based on hg19. As above, featureCounts<sup>25</sup> was used to quantify  
714 expression of genes and exons relative to Ensembl v75, and junctions were quantified with  
715 regtools<sup>26</sup> as above. We used StringTie with the assembled merged GTF from the LIBD DLPFC  
716 samples on the GEUVADIS BAM files to quantify the same transcripts, and used bwtool to  
717 quantify the coverage of the same expressed regions from the GEUVADIS LCL samples.

718 *CommonMind Consortium (CMC)*: 547 BAM files were downloaded from Synapse, which were  
719 aligned with TopHat2 (version 2.0.9) using Ensembl v70 transcriptome annotation and the hg19  
720 genome. As above, featureCounts<sup>25</sup> was used to quantify expression of genes and exons  
721 relative to Ensembl v75, and junctions were quantified with regtools<sup>26</sup> as above. We used  
722 StringTie with the assembled merged GTF from the LIBD DLPFC samples on the CMC BAM  
723 files to quantify the same transcripts, and used bwtool to quantify the coverage of the same

724 expressed regions from the CMC brain samples. Genotypes were converted to plink file sets  
725 from GEN files obtained from Synapse using posterior probabilities > 90%, resulting in genotype  
726 data across 9,506,038 SNPs and 547 samples.

727

#### 728 Differential expression across brain development

729 We modeled differential expression across age at each of the five feature summarizations  
730 (gene, exon, junction, transcript, and ER) in the 320 control subjects across the lifespan. We  
731 modeled expression, after transforming with log<sub>2</sub> with an offset of 1, as a function of age after  
732 creating using linear splines with breakpoints at ages: birth (0), 1, 10, 20, and 50, further  
733 adjusting for sex and ancestry/ethnicity (first 3 MDS components). F-statistics were computed  
734 comparing the model containing age (including the linear splines), sex, and ethnicity, to a  
735 statistical model with just sex and ethnicity, with corresponding p-values calculated based on an  
736 F-distribution with 11 and 308 degrees of freedom, and Bonferroni adjustment within each  
737 feature type was performed using the number of features with non-zero expression (gene  
738 RPKM > 0.01, exon RPKM > 0.1, and junction RPKM > 0.2 with non-novel annotation) across  
739 all samples as the number of tests (which varied by feature type). We also computed post-hoc  
740 statistics on the data, including the Pearson correlation between “cleaned” expression (after  
741 regressing out the effects of sex and ethnicity, holding the age effects constant), and age to  
742 determine if the expression of the fetal rose or fell across the lifespan, and also measured the  
743 fetal versus postnatal log<sub>2</sub> fold changes.

744 Preferential isoform usage across aging was determined by identifying the subset of genes (by  
745 Ensembl ID) that contained at least one Bonferroni-significant feature that had positive  
746 correlation with age and another Bonferroni-significant feature that had negative correlation with  
747 age. We also computed the difference in positive and negative correlations as a measure of the  
748 magnitude of the preferential isoform use. Gene set analyses using pre-defined gene ontology  
749 (GO) and Kyoto Encyclopedia of Genes and Genomes (KEGG) sets were performed using the  
750 clusterProfiler R/Bioconductor package<sup>35</sup>, here using the genes (mapping from Ensembl to  
751 Entrez ID) that had such preferential isoform use to those that were developmentally regulated  
752 (having at least one feature that was associate with age at Bonferroni significance).  
753 Enrichments with the PGC2 schizophrenia risk loci – defined by the chr:start-end roughly  
754 corresponding to linkage disequilibrium blocks in the published manuscript - were performed  
755 both parametrically, by overlapping the genomic coordinates of the 108 risk regions with those  
756 genes that had preferential isoform usage, compared to a background of all genes with each set  
757 of expressed features, as well as by permuting the locations of the 108 regions across the  
758 genome 10,000 times and each time, re-computing the overlap within these null regions – see  
759 additional details in Jaffe et al 2015<sup>7</sup>. Empirical p-values were calculated by counting the  
760 number of the odds ratios across the 10,000 null permutations to each observed odds ratio.

761

#### 762 Schizophrenia differential expression analyses

763 *Discovery dataset analysis:* we first filtered the subjects with RNA-seq to retain a more stringent  
764 set of 155 SCZD cases and 196 controls (criteria: ages between 17-80, gene assignment rate >  
765 0.5, mapping rate > 0.7, RIN > 6, not outlying on 2nd ancestry PC, only self-reported  
766 Caucasians and African Americans). We fit three statistical models across each of the  
767 expression summarizations, modeling  $\log_2$  transformed expression (with an offset of 1) as a  
768 function of:

769 (1) Adjusted ("*\_adj*" suffix in supplementary tables): SCZD diagnosis, adjusting for age, sex,  
770 ancestry (SNP PCs 1, 5, 6, 9, 10, which were at least marginally associated with diagnosis), and  
771 then observed measures related to RNA quality: RIN, mitochondrial mapping rate, and gene  
772 assignment rate.

773 (2) Adjusted + Quality Surrogate Variables ("*\_qsva*" suffix in supplementary tables): SCZD  
774 diagnosis adjusting for "Adjusted" model as well as the first 12 PCs from the degradation matrix  
775 (see below) based on polyA+ libraries (selected using to using the BE algorithm<sup>33</sup> in the *sva*  
776 Bioconductor package<sup>34</sup> while providing the adjusted model as input).

777 (3) Adjusted + Principal Components ("*\_pca*" suffix in supplementary tables): SCZD diagnosis  
778 adjusting for "Adjusted" model as well as the first *k* PCs from the expressed features (using the  
779 50000 most variable features) depending on the feature type (gene: 23 PCs, exon: 20 PCs,  
780 transcript: 26 PCs, junction: 26 PCs, ERs: 23 PCs).

781 We used the ``lmTest`` and ``ebayes`` functions in the *limma* Bioconductor package<sup>36</sup> to fit all of  
782 the statistical models to estimate  $\log_2$  fold changes, moderated T-statistics, and corresponding  
783 p-values. Multiple testing correction via the false discovery rate (FDR) was applied using the set  
784 of expressed features in this sample set for each summarization type: 24,122 genes (mean  
785 RPKM > 0.1), 420,022 exons (mean RPKM > 0.2), 61,950 transcripts (mean FPKM > 0.2),  
786 229,846 junctions (mean RP80M > 1), and the 275,885 ERs.

787

788 *RNA quality correction:* We summarize the RNA quality correction approach here – for more  
789 detail, see the companion paper by Jaffe et al 2016<sup>15</sup>. Briefly, the quality surrogate variable  
790 analysis (qSVA) uses RNA sequencing data generated from five DLPFC tissue samples left  
791 unfrozen for 0, 15, 30 and 60 minutes, resulting in 20 RNA samples. These samples were  
792 sequenced with both polyA+ and RiboZero library preparations, and gene, exon and junction  
793 counts were derived as above. We utilized the gene-level effects of degradation in these data in  
794 Figure S5 to demonstrate residual confounding by RNA quality, which we call the “DEQual Plot”.

795 For a given preparation type, we identified the genomic regions most susceptible to degradation  
796 by correlating coverage at expressed regions<sup>6</sup> to degradation time, adjusting for donor. This  
797 statistical modeling identified 515 regions significantly susceptible to degradation (at Bonferroni  
798 significance) in the RiboZero libraries and the top 1000 regions most susceptible to degradation  
799 (among the 35,287 at Bonferroni significance) in the polyA+ libraries – the BED files for these  
800 degradation-susceptible regions are available at: [https://github.com/nellore/region\\_matrix](https://github.com/nellore/region_matrix).

801 The algorithm then involves selecting the set of regions for a particular library type and  
802 calculating total coverage within each region in the new user-provided samples (e.g. the 495  
803 DLPFC RNA-seq polyA+ samples) to form the degradation matrix (which is either 515 or 1000  
804 rows by N samples). Then PCA is performed on the log<sub>2</sub> transformed degradation matrix (with  
805 an offset of 1) and the top K PCs are selected, for example using the BE algorithm<sup>33</sup>, and  
806 extracted – the set of these PCs are referred to as quality surrogate variables (qSVs), and are  
807 included as adjustment variables in subsequent differential expression analyses.

808 *Replication dataset analysis:* we performed analogous sample selection procedures as in the  
809 discovery dataset to select 159 patients and 172 controls (total gene assignment rate > 0.3,  
810 alignment rate > 0.8, RIN > 6, ages between 18-80, non-outlying on genetic ancestry PCs 3 and  
811 5 and keeping only reported Caucasians and African Americans). We similarly fit the three sets  
812 of statistical models to all five feature summarizations, with the following differences compared  
813 to the discovery analysis:

814 (1) Adjusted model: the model here was diagnosis adjusting for age, sex, race, brain bank, RIN,  
815 gene assignment rate, alignment rate.

816 (2) qSVA model: the degradation matrix was constructed using the 515 regions based on the  
817 RiboZero libraries in the degradation experiment.

818 (3) PC adjustment: for each feature summarization type, we included: 27 PCs for genes, 29 PCs  
819 for exons, 39 PCs for transcripts, 39 PCs for junctions, and 33 PCs for ERs.

820 In these replication data we did not perform FDR correction. We were using the study for  
821 replication, not discovery, and therefore only used the features that were expressed in our data  
822 regardless of the expression levels in CMC. We considered features independently replicated if  
823 they had the same directionality for the SCZD versus control log<sub>2</sub> fold change and were  
824 marginally significant (at p < 0.05) in the CMC dataset.

825 Gene set analyses on replicated differentially expressed features and genes were performed  
826 with clusterProfiler<sup>35</sup> as described above. Set-level analyses on features in the GWAS risk  
827 regions were conducted by assigning each expressed feature a binary variable for whether it  
828 was in the risk regions or not. Then we fit a linear regression model of the t-statistics for  
829 diagnosis, adjusted by the qSVA approach, as a function as whether the feature was in the risk  
830 region, adjusting for its average expression level. This analysis was conducted across and then  
831 within each of the five feature summarization types.

832

### 833 eQTL discovery analyses

834 We performed eQTL analyses separately by feature type (gene, exon, junction, transcript, and  
835 ER) allowing for a 500kb window around each of the 7,421,423 common SNPs in the 412 age >  
836 13 samples, adjusting for ancestry (first three MDS components from the genotype data), sex,  
837 diagnosis, and the first K principal components (PCs) of the normalized expression features,  
838 where K was calculated separately by feature type using the Buja and Eyuboglu permutation-

839 based algorithm<sup>33</sup> in the “sva” Bioconductor package<sup>34</sup> (gene: 22 PCs, exon: 19 PCs, junction:  
840 26 PCs, transcript: 25 PCs, expressed regions: 20 PCs). The eQTL analyses were run using the  
841 MatrixEQTL R package<sup>37</sup>, which returned the log<sub>2</sub> fold change per allele copy, and  
842 corresponding T-statistic, p-value, and FDR for each SNP-feature pair. We further used the LD-  
843 independent SNPs to estimate the effective number of tests (by counting the number of features  
844 within a 500kb window around each LD independent SNP) for a more conservative Bonferroni  
845 adjustment. For all five feature types, we retained all eQTLs with FDR < 1%. We retained the  
846 best SNP for each expression feature for more detailed annotation and we calculated post-hoc  
847 statistics separately by reported race (Caucasian or African American) using corresponding  
848 subsets of the same design matrix.

#### 849 eQTL replication analyses

850 We sought to replicate the best SNP-Feature pair for each eQTL in two independent datasets:  
851 CommonMind Consortium and the GTEx project. As not every single SNP imputed in the  
852 discovery dataset was present in each of CMC and GTEx, we retained the most highly ranked  
853 (by eQTL p-value) SNP that was present in each dataset, and tested these SNP-Feature pairs  
854 for replication.

855 *CommonMind Consortium*: for the ranked eQTL lists for each feature type (gene, exon, junction,  
856 transcript, and ER), we retained the best discovery SNP present in the replication dataset. The  
857 majority of these tested SNP-Feature pairs used the SNP with the best discovery p-value. For  
858 example, among 1,812,008 FDR-significant SNP-Gene pairs, 1,539,218 pairs were present in  
859 CMC (84.9%), and among the 18,394 genes with at least one FDR-significant SNP, 14,928  
860 (81.1%) of the top ranked SNPs were present, and therefore used for replication. Another 2,279  
861 genes had FDR-significant SNPs more lowly ranked in the discovery set that were tested for  
862 replication, and 1,187 genes did not have any FDR-significant SNPs present in CMC. The  
863 proportions of present top-ranked SNPs retained for replication were similar across the different  
864 feature summarizations: gene=81.1%, exon=82.1%, junction=81.5%, ER=80.6%,  
865 transcript=79.4%. The number of tested SNP-feature pairs across all expression  
866 summarizations is provided in Table S9.

867 We calculated the corresponding principal components (PCs) across all expression features  
868 separately in the 547 samples, as in the discovery data, and in our tests for replication, modeled  
869 the log<sub>2</sub>-transformed expression data as a function of additive genotype effect, controlling for  
870 the top 10 expression PCs per summary type and the first 3 ancestry MDS components from  
871 the genetic data. We lastly used the allele information to ensure additive effects across study  
872 were relative to the same allele, flipping the directionality of such effects where the major allele  
873 in one study corresponded to the minor allele in the other study. The eQTLs that were  
874 directionality consistent (same allelic directionality of the additive effect on expression) and had  
875 marginal significance ( $p < 0.01$ ) were considered replicated and retained for summarization.

876 *GTEx*: we performed analogous replication analyses as described above across the 1184 GTEx  
877 brain samples that had genotype and RNA-seq data. While we calculated eQTL replication  
878 statistics separately by brain region, we adjusted for the first 10 expression PCs from the entire  
879 sample (across all brain regions), as well as MDS ancestry components from across the



880 genome. We only considered eQTLs from the frontal cortex brain region for replication,  
881 enforcing directional consistency as the data set was much smaller than both our discovery and  
882 first replication dataset (N=99).

883 After computing replication statistics in the CMC and GTEx frontal cortex datasets, the eQTLs  
884 that were directionality consistent (same allelic directionality of the additive effect on expression)  
885 in both datasets and had marginal significance ( $p < 0.01$ ) in CommonMind were considered  
886 replicated and retained for summarization (see Table S9). Factors positively influencing  
887 replication were, as expected, the statistical magnitude of the eQTL effect (absolute T-statistic),  
888 the minor allele frequency, and the mean expression level.

889

890

#### 891 Clinical enrichment analyses:

892 We first calculated the “risk” effects of the schizophrenia GWAS variants using the set of all  
893 GWAS results from: <https://www.med.unc.edu/pgc/files/resultfiles/scz2.snp.results.txt.gz> and  
894 identified which allele at each SNP corresponded to increased risk, e.g. a positive odds ratio.  
895 We then used these risk alleles to convert the directionality of our eQTL effects to reflect the  
896 reference allele being the risk allele (rather than the minor allele). Lastly, we incorporated the  
897 qSV-adjusted case-control fold changes to identify the genetic and clinical directional consistent  
898 features. Enrichment analyses for fetal effects, isoform shift genes, and directional consistency  
899 was performed using Chi-squared tests with 1 df using the ``chisq.test()`` in R.

900

#### 901 **References**

- 902 2 Ripke, S. *et al.* Biological insights from 108 schizophrenia-associated genetic loci.  
903 *Nature* **511**, 421+, doi:10.1038/nature13595 (2014).
- 904 4 Perteira, M. *et al.* StringTie enables improved reconstruction of a transcriptome from  
905 RNA-seq reads. *Nature biotechnology* **33**, 290-295, doi:10.1038/nbt.3122 (2015).
- 906 6 Collado Torres, L. *et al.* Flexible expressed region analysis for RNA-seq with derfinder.  
907 *Nucleic Acids Research In Press.*, doi:10.1101/015370 (2016).
- 908 7 Jaffe, A. E. *et al.* Developmental regulation of human cortex transcription and its clinical  
909 relevance at single base resolution. *Nat Neurosci* **18**, 154-161, doi:10.1038/nn.3898  
910 (2015).
- 911 15 Jaffe, A. E. *et al.* A framework for RNA quality correction in differential expression  
912 analysis. *bioRxiv*, doi:10.1101/074245 (2016).
- 913 23 Lipska, B. K. *et al.* Critical factors in gene expression in postmortem human brain: Focus  
914 on studies in schizophrenia. *Biol Psychiatry* **60**, 650-658,  
915 doi:10.1016/j.biopsych.2006.06.019 (2006).
- 916 24 Kim, D. *et al.* TopHat2: accurate alignment of transcriptomes in the presence of  
917 insertions, deletions and gene fusions. *Genome Biol* **14**, R36, doi:10.1186/gb-2013-14-4-  
918 r36 (2013).

- 919 25 Liao, Y., Smyth, G. K. & Shi, W. featureCounts: an efficient general purpose program for  
920 assigning sequence reads to genomic features. *Bioinformatics* **30**, 923-930,  
921 doi:10.1093/bioinformatics/btt656 (2014).  
922 26 regtools v. 0.1.0 (2016).  
923 27 Trapnell, C. *et al.* Transcript assembly and quantification by RNA-Seq reveals  
924 unannotated transcripts and isoform switching during cell differentiation. *Nature*  
925 *biotechnology* **28**, 511-515, doi:10.1038/nbt.1621 (2010).  
926 28 Frazee, A. C. *et al.* Ballgown bridges the gap between transcriptome assembly and  
927 expression analysis. *Nature biotechnology* **33**, 243-246, doi:10.1038/nbt.3172 (2015).  
928 29 Scharpf, R. B., Irizarry, R. A., Ritchie, M. E., Carvalho, B. & Ruczinski, I. Using the R  
929 Package crlmm for Genotyping and Copy Number Estimation. *J Stat Softw* **40**, 1-32  
930 (2011).  
931 30 Howie, B. N., Donnelly, P. & Marchini, J. A flexible and accurate genotype imputation  
932 method for the next generation of genome-wide association studies. *PLoS genetics* **5**,  
933 e1000529, doi:10.1371/journal.pgen.1000529 (2009).  
934 31 Delaneau, O., Coulonges, C. & Zagury, J. F. Shape-IT: new rapid and accurate  
935 algorithm for haplotype inference. *BMC bioinformatics* **9**, 540, doi:10.1186/1471-2105-9-  
936 540 (2008).  
937 32 Purcell, S. *et al.* PLINK: a tool set for whole-genome association and population-based  
938 linkage analyses. *American journal of human genetics* **81**, 559-575, doi:10.1086/519795  
939 (2007).  
940 33 Buja, A. & Eyuboglu, N. Remarks on Parallel Analysis. *Multivariate Behavioral Research*  
941 **27**, 509-540, doi:10.1207/s15327906mbr2704\_2 (1992).  
942 34 Leek, J. T., Johnson, W. E., Parker, H. S., Jaffe, A. E. & Storey, J. D. The sva package  
943 for removing batch effects and other unwanted variation in high-throughput experiments.  
944 *Bioinformatics* **28**, 882-883, doi:10.1093/bioinformatics/bts034 (2012).  
945 35 Yu, G., Wang, L. G., Han, Y. & He, Q. Y. clusterProfiler: an R package for comparing  
946 biological themes among gene clusters. *Omics : a journal of integrative biology* **16**, 284-  
947 287, doi:10.1089/omi.2011.0118 (2012).  
948 36 Smyth, G. K. Linear models and empirical Bayes methods for assessing differential  
949 expression in microarray experiments. *Statistical applications in genetics and molecular*  
950 *biology* **3**, Article 3 (2004).  
951 37 Shabalin, A. A. Matrix eQTL: ultra fast eQTL analysis via large matrix operations.  
952 *Bioinformatics* **28**, 1353-1358, doi:10.1093/bioinformatics/bts163 (2012).

953

954 **Author information:** sequencing reads and genotype data are available through SRA and  
955 dbGaP at accession numbers: [TBD]. Reprints and permissions information is available  
956 at [www.nature.com/reprints](http://www.nature.com/reprints). Correspondence and requests for materials should be addressed  
957 to Andrew Jaffe ([andrew.jaffe@libd.org](mailto:andrew.jaffe@libd.org)). The following authors have competing interests:

958 Tony Kam-Thong is employed by F. Hoffmann-La Roche

959 Hualin S Xi and Jie Quan are employees of Pfizer Inc.

960 Alan Cross, and Nicholas J. Brandon were full time employees and shareholders in AstraZeneca  
961 at the time these studies were conducted.

962 The remaining authors declare no competing financial interests.

963

## 964 **Supplementary Information**

### 965 *Supplementary Figure Legends:*

966 **Figure S1:** Study overview and cartoon describing quantifying the five different expression  
967 summarizations.

968 **Figure S2:** Cartoon describing the four different splice junction annotation classes, relative to  
969 annotated exons (dark blue rectangles). (A) Annotated splice junctions map between two exons  
970 in a known transcript. (B) Exon-skipping splice junctions map to two annotated exons in different  
971 transcripts. (C) Alternative start/exon junctions map to only one annotated exon on either the 5'  
972 or 3' end. (D) Completely novel junction do not map to any known exon.

973 **Figure S3:** Venn diagram of developmentally regulated features mapped back to Ensembl  
974 Gene IDs by the five feature summarization methods. DER: differentially expressed region.

975 **Figure S4:** Venn diagram of Ensembl Gene IDs that contain significant isoform shifts by the four  
976 feature summarization methods that allow for multiple features per gene. DER: differentially  
977 expressed region.

978 **Figure S5:** Degradation quality (DEqual) plots for diagnosis-associated differential expression  
979 analyses at the gene level. Y-axis: T-statistic for the effect of RNA degradation on each gene, X-  
980 axis: diagnosis T-statistic, adjusting for (left) nothing/univariate effect, (middle) observed clinical  
981 and technical confounders and (right) the inclusion of the quality surrogate variables.

982 **Figure S6:** Replication rates for three differential expression statistical models. X-axis:  
983 discovery p-value, Y-axis: replication rate, e.g. the proportion of features that have directional  
984 consistency and are marginally significant (at  $p < 0.05$ ) in independent data. Point size is  
985 proportion to the number of features called significant at the indicated p-value threshold.

986 **Figure S7:** Scatter plot of effect sizes (fold changes) in discovery and replication datasets for  
987 those features significant and replicated. Colors have the same legend as Figure 3A.

988 **Figure S8:** GWAS loci set-level analysis for (A) all features together and then stratified by only  
989 (B) genes, (C) exons, (D) junctions, (E) transcripts and (F) expressed regions. P-values were  
990 based on the Wilcoxon rank sign test.

991 **Figure S9:** Boxplots of single gene eQTL effects for GWAS associated SNPs for the  
992 associations not featured in Figure 4.

993

### 994 *Supplementary Table Legends:*

995 **Table S1:** Demographic information for subjects in the present study, stratified by age and  
996 diagnosis group. Dx: diagnosis, N: sample size, F: Female, Cauc: Caucasian, SD: standard  
997 deviation, PCW: post-conception weeks. Antipsychotic use was measured using toxicology at

998 time of death. P-values for diagnosis differences in continuous variables are based on linear  
999 regression and P-values for categorical variables are based on chi-squared tests.

1000 **Table S2:** Splice junction annotation and characterization in GTEx and GEUVADIS for any  
1001 junction or highly expressed junctions (mean reads per 80M mapped reads, RP80M > 0 and 5).  
1002 Each column represents a 2x2 table for presence of identified junctions in 495 DLPFC samples  
1003 in two independent polyA+ datasets. This table is analogous to Table 1.

1004 **Table S3:** Summary statistics for those features significantly developmentally regulated in the  
1005 control-only analyses across the lifespan.

1006 **Table S4:** Significant developmentally regulated features collapsed to Ensembl Gene ID, used  
1007 to make Figure S3

1008 **Table S5:** Isoform shifts by Ensembl Gene ID and feature summarization type.

1009 **Table S6:** Gene set analyses for those genes with significant isoform shift, stratified by feature  
1010 summarization type. Q-values, which control the false discovery rate, FDR, are shown.

1011 **Table S7:** Genes within the PGC schizophrenia GWAS risk regions that contain isoform shifts  
1012 by feature summarization type. 21.8% of PGC2 genes had developmental isoform shifts using  
1013 exon counts (N=96/440) and 31.9% showed this isoform shift association based on junction  
1014 counts (N=137/430)

1015 **Table S8:** eQTL replication metrics for CommonMind Consortium, GTEx frontal cortex, and both  
1016 among all significant eQTLs in the discovery adult sample.

1017 **Table S9:** eQTL statistics for the best SNP-feature pair in the discovery sample that replicated  
1018 in CMC and GTEx frontal cortex, by feature type.

1019 **Table S10:** Differential expression statistics for those features that were significant and  
1020 replicated in case-control comparisons.

1021 **Table S11:** Genes consistently differentially expressed by case-control analysis for the different  
1022 feature summarizations.

1023 **Table S12:** Associations between diagnosis, RPS and expression at gene and exon levels. First  
1024 two columns for each feature: p-values for gene set tests for the significant case-control  
1025 features among statistics capturing the effect of RPS on expression. Second two columns for  
1026 each feature: directionality between RPS on expression associations and diagnosis on  
1027 expression associations.

1028 **Table S13:** Gene set analysis for genes with features differentially expressed by case-control  
1029 status, stratified by directionality and feature summarization type.

1030 **Table S14:** GWAS region set-level analyses for diagnosis-associated differentially expressed  
1031 features, testing whether features in the PGC risk loci were more or less expressed as a set in

1032 cases compared to controls. Qual: qSVA adjusted analysis, Adj: observed covariate adjusted  
1033 analysis.

1034 **Table S15:** eQTL statistics for all PGC SCZD GWAS variants, including the risk direction (eQTL  
1035 and GWAS) and clinical direction (case-control fold change)

1036 **Table S16:** eQTL statistics filtered to those that were directionally consistent between risk and  
1037 clinical directionalities

1038 **Table S17:** Analogous to Table 2 with Ensembl transcript annotation data to highlight transcript  
1039 specificity.

1040

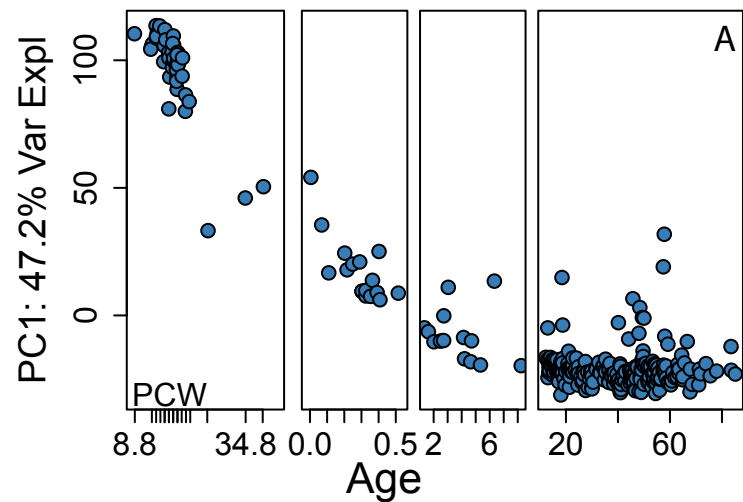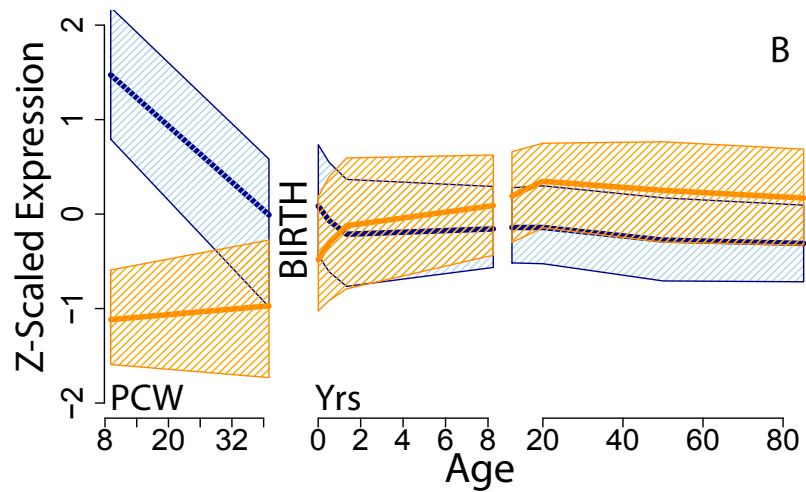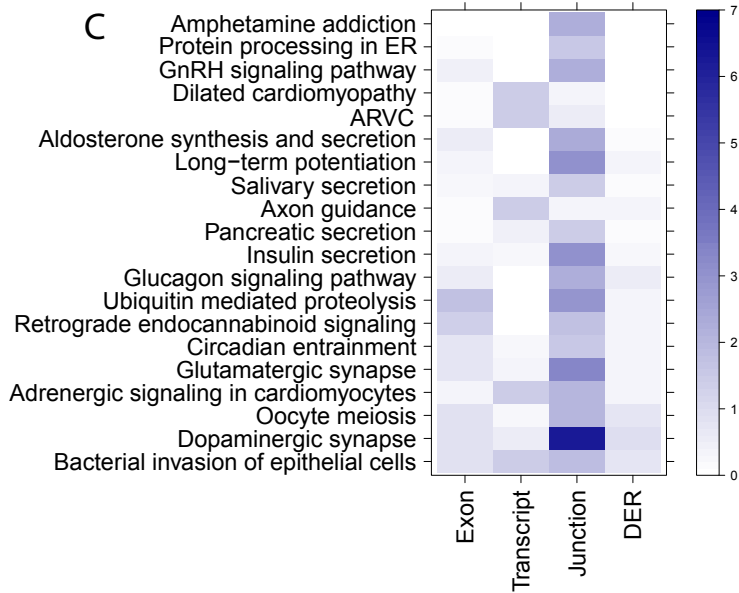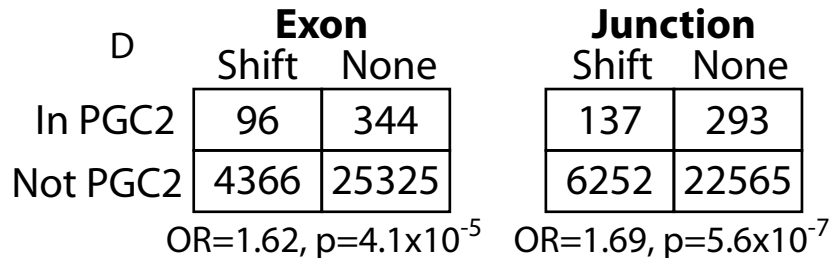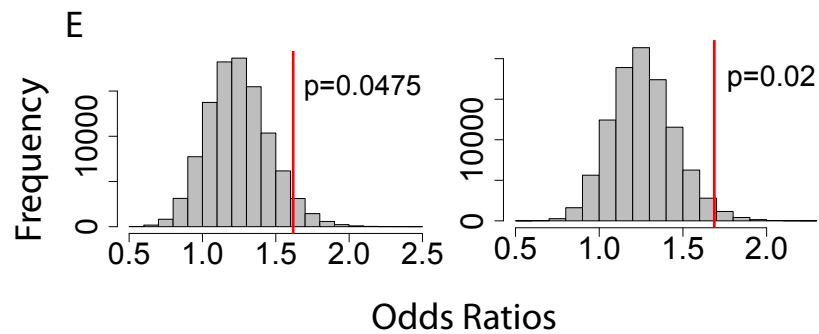

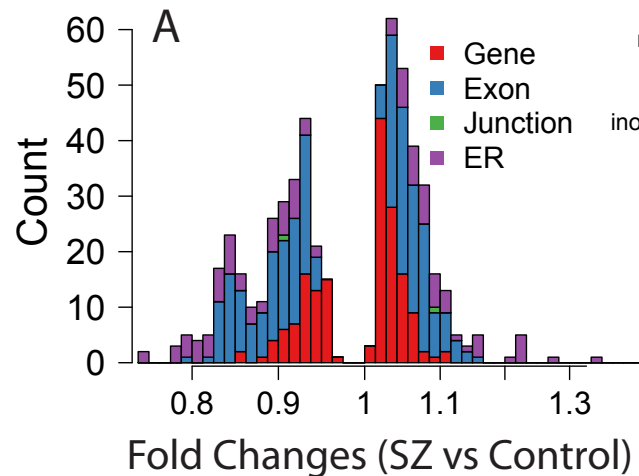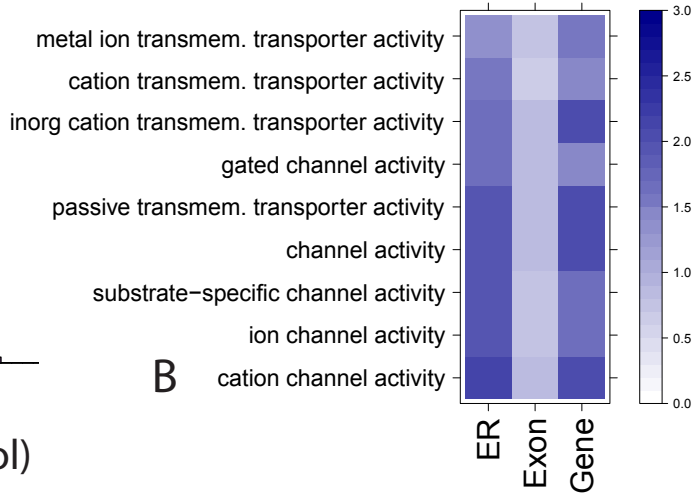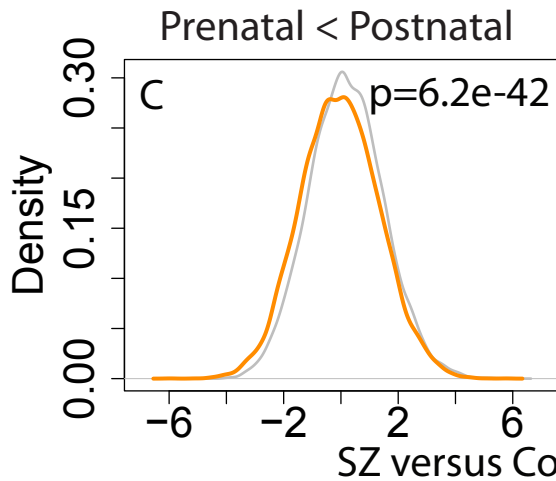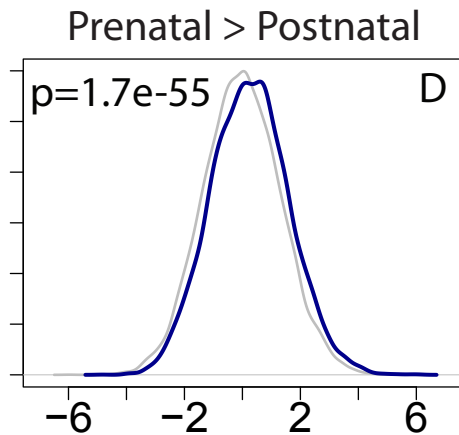

| A                  | Gene           | Exon         | Transcript     | Junction      | DERs         |
|--------------------|----------------|--------------|----------------|---------------|--------------|
| # Bonf < 0.05      | 4934           | 36299        | 2993           | 5683          | 20295        |
| p-value cutoff     | 8.39E-09       | 7.64E-10     | 1.71E-09       | 1.09E-09      | 1.28E-09     |
| # Ens Genes        | 4934           | 6698         | 1708           | 2588          | 5381         |
| # Sym Genes        | 3675           | 5195         | 1701           | 2376          | 4503         |
| Effect Size        | 1.07           | 1.15         | 1.1            | 1.36          | 1.25         |
| Median (IQR)       | (1.04-1.11)    | (1.1-1.23)   | (1.05-1.2)     | (1.19-1.63)   | (1.16-1.42)  |
| Distance           | -40bp          | -27bp        | -130bp         | -23bp         | -23bp        |
| Median (IQR)       | (-9.4kb-9.4kb) | (-14kb-13kb) | (-7.8kb-5.9kb) | (-10kb-8.8kb) | (-13kb-12kb) |
| % Novel            | NA             | NA           | 37.5%          | 11.3%         | 52.7%        |
| % Isoform-specific | NA             | 67.0%        | 100%           | 31.1%         | NA           |

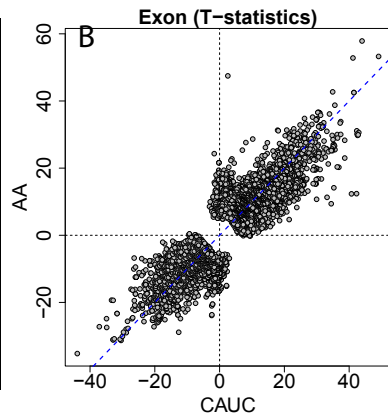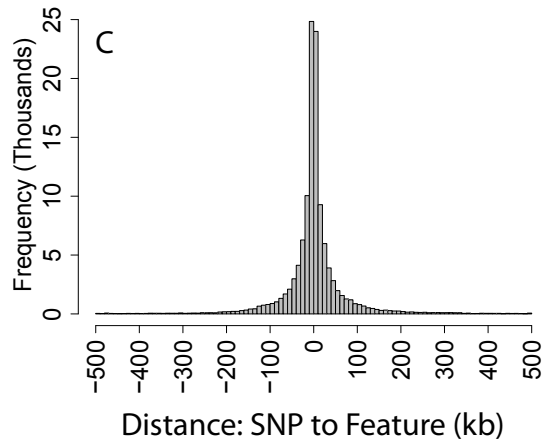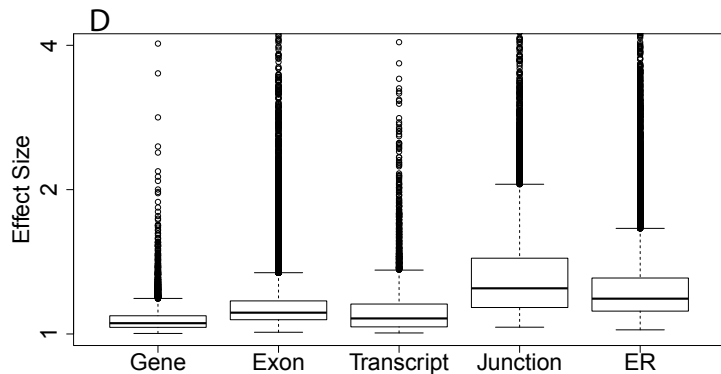



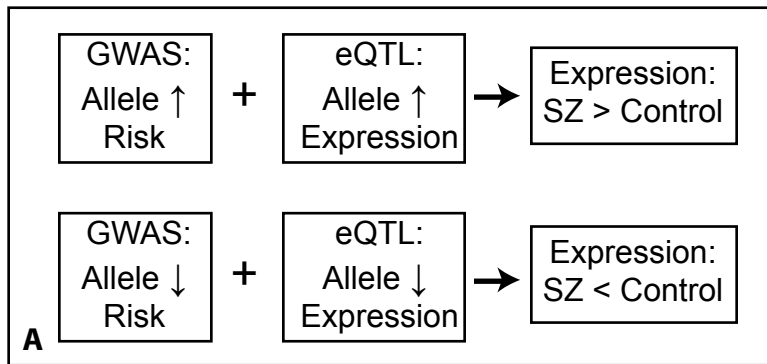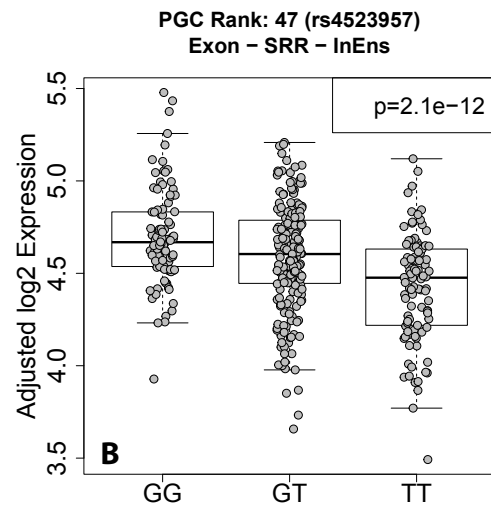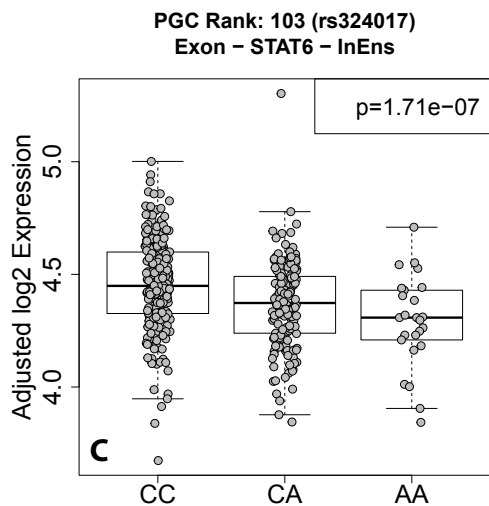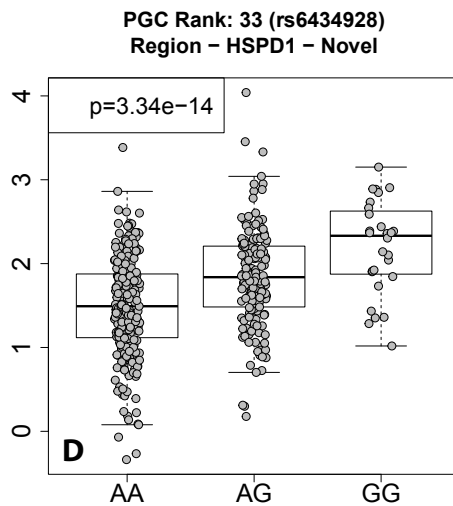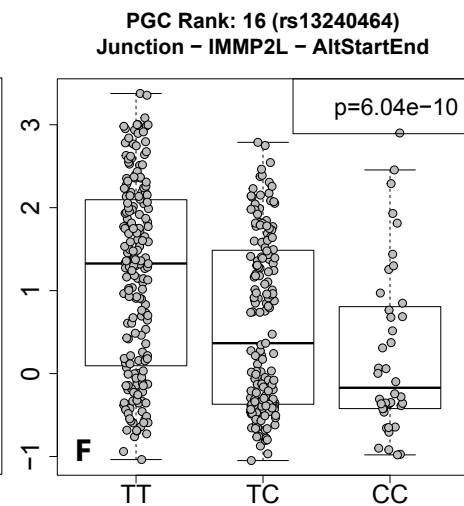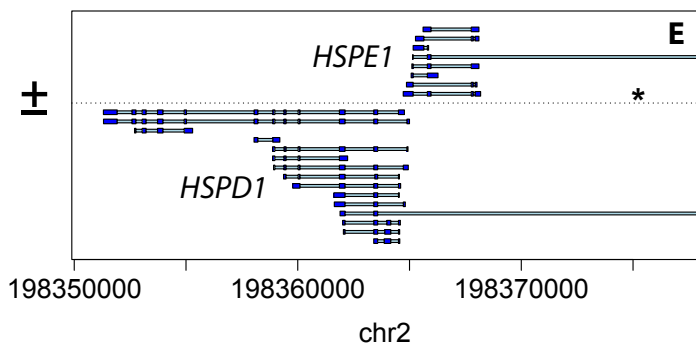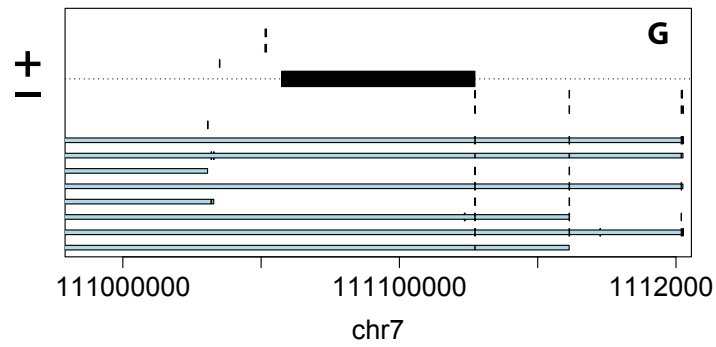

## Supplementary Results for: Developmental and genetic regulation of the human frontal cortex transcriptome in schizophrenia

Andrew E Jaffe, Richard E Straub, Joo Heon Shin, Ran Tao, Yuan Gao, Leonardo Collado Torres, Tony Kam-Thong, Hualin S Xi, Jie Quan, Carlo Colantuoni, Qiang Chen, Bill Ulrich, Brady J. Maher, Amy Deep-Soboslay, The BrainSeq Consortium, Alan Cross, Nicholas J. Brandon, Jeffrey T Leek, Thomas M. Hyde, Joel E. Kleinman, Daniel R Weinberger

### 1. Deep characterization of the human cortex transcriptome

We used Ensembl v75 annotation to quantify the normalized expression (via reads per kilobase per million reads mapped, RPKM) of 615,410 exons across 63,677 genes, and guided transcript assembly within and across samples to identify and quantify 188,578 transcripts with at least modest expression across all of the samples<sup>1</sup>. Only approximately half of the assembled transcripts were found in Ensembl annotation (N=100,932, 53.5%), while 41.8% (N=78,751) consisted of transcripts with novel splicing patterns. We also more directly interrogated the spliced alignments, which supported 3,582,199 unique exon-exon splice junctions across the 495 samples. We defined four classes of splice junctions based on the Ensembl gene/transcript annotation – present/existing, exon skipping, alternative exonic boundary, and completely novel (Figure S2, Table S2), and found moderate expression of many potentially unannotated transcripts in brain. To assess the replication and brain specificity of our findings, we identified junctions in both the brain samples from the GTEx project (N=1,393 samples from 201 individuals) and lymphoblastoid cell lines (LCLs) from the GEUVADIS project (N=666, see Methods). Overall, we find extensive replication in human brain GTEx samples of annotated junctions (95.0%), and high replication of potentially novel transcripts that capture exon skipping (75.6%) or alternative exonic boundaries (65.8%), with extremely high replication (>95%, Table 1). Much of this novel transcriptional activity appeared relatively-brain specific, as few junctions identified in DLPFC were present only in GEUVADIS LCLs and not GTEx brain samples further suggesting that this degree of junction discovery was not largely driven by alignment software. We lastly defined “expressed regions” (ERs) of contiguously expressed sequence – these ERs and junctions together can “tag” elements of transcripts in the data that are not constrained by limitations or incompleteness of existing annotation.

### 2. Developmental regulation of human brain transcription

We sought in this study to more fully characterize developmental regulation of transcription across human brain development and aging, and modeled dynamic expression in 320 control samples using flexible linear splines in each of the five expression summarizations (see Methods). We found widespread developmental regulation across all five features (Table S3) corresponding to 30,490 unique Ensembl genes (across 20,596 gene symbols), including a core set of 15,603 genes with all five features showing convergent expression association with

development/aging (Figure S3). There were 89,865 previously unannotated expressed features corresponding to the majority of genes (17,374 IDs and 15,261 symbols) with genome-wide significant dynamic expression across brain development in these unaffected subjects (Table S4). The majority of these unannotated features were identified using the splice junction counts (N=43,512, 48.4%) of which 31,183 junctions (71.7%) tagged alternative exonic boundaries and 12,329 junctions (28.3%) corresponding to exonic skipping, while there were 26,010 differentially expressed regions (DERs, 28.9%) that all correspond to alternative exonic boundaries and 20,343 transcripts of which 19,138 (94.1%) correspond to exonic skipping.

### 3. Expression associations with chronic schizophrenia illness

Given the apparent lower RNA quality of patient samples in virtually all schizophrenia brain case control studies including our own (see Table S1), we filtered the 384 samples above age 17 (209 controls and 175 patients) to a subset of 351 higher quality samples (196 controls and 155 cases) using metrics of age, ancestry, RNA quality, and cryptic ancestry (see Methods). Even after filtering, using gene-level expression, univariate comparisons between SCZD patients and controls identified 12,686 genes differentially expressed (DE) at a false discovery rate (FDR) < 5%, suggesting a large degree of bias. Regression modeling, adjusting for age, sex, ancestry, and observed RNA quality (see Methods) reduced the extent of confounding, resulting in 1,988 genes DE between patients and controls at FDR < 5%. We identified the largest number of significant and replicated DE features using exon counts (N=274) followed by gene counts (N=170) and expressed region counts (N=110). Very few DE junctions (N=2) and no DE transcripts were identified and independently replicated, which likely highlight the decreased statistical power using these approaches when annotated features are differentially expressed (see Discussion). Approximately one half of the genes annotated by these DE features were identified using gene-level summarization only (86/170, 50.6%), which utilize the largest number of reads collapsed across all possible transcript isoforms (Table S11). The majority of genes with DE signal were only supported by a single summarization type across both Ensembl IDs (142/237, 59.9%) and gene symbols (119/209 56.9%, Table S11).

Interestingly, analogous analyses for developmental regulation of schizophrenia-associated features without adjusting for the RNA quality qSVs were significant in the opposite directions, namely that schizophrenia-associated changes were further from, rather than closer to, fetal expression levels, which would be predicted as an effect of residual RNA quality confounding (as the quality of the samples were ranked fetal > adult control > adult SZ, see Table S1). This directional difference in RNA quality between fetal and postnatal samples is also typical of earlier studies (e.g. Colantuoni, Geschwind, etc).

### 4. GWAS implications of illness-associated expression differences

Only two genes in the 108 significant schizophrenia GWAS loci (*KLC1* and *PPP2R3A*) had expression features significantly differentially expressed and replicated. To potentially identify more subtle associations within these GWAS risk regions, we performed an exploratory “feature set” analysis (analogous to traditional gene set analyses) comparing the schizophrenia differential expression statistics of all expressed features within the loci to those outside the loci. We found decreased expression of the 15,050 expressed features within the risk loci in patients compared to controls, relative to the 996,775 expressed features outside of the loci, adjusting for mean expression level (Figure S8A,  $p = 3.32 \times 10^{-36}$ , Table S13). While the absolute set-level effect sizes were small, these GWAS region-level associations were largely consistent when stratified by summarization type, with the exception of transcript counts which showed no association. Of particular importance is the observation that these findings also were only significant after quality adjustment in the differential expression analysis (Figures S8B-F) – analyses adjusting for only the usual observed confounders (e.g. clinical covariates and observed quality variable) showed no enrichment among PGC risk regions ( $p=0.2$ , Table S13). Therefore, while many of the case-control expression differences that meet both genome-wide statistical significance and replication criteria may be related to schizophrenia treatment and epiphenomena and depleted for GWAS regions, some differences in expression in some subsets of patient populations might be related to genetic risk for the disorder, though the biological interpretation of the feature distribution differences is not clear. Larger studies can likely improve power to detect expression changes within the GWAS risk regions amidst the clinical and molecular heterogeneity of schizophrenia.

## 5. Genetic control of RNA expression levels in the cortex

In order to elucidate the RNA features associated with schizophrenia risk variants themselves, rather than LD regions, we first performed a *cis* (<500kb) genome-wide expression quantitative trait loci (eQTL) analysis across the five expression feature summarizations. These analyses were performed within the post-adolescent subjects, including both cases and controls (age > 13, N=412) across densely observed and imputed common and high-quality SNP genotypes (MAF > 5%, N=7,421,423), adjusting for components related to ancestry and expression heterogeneity in each feature type (see Methods). Given the large number of tests, but also the need for comparability across the five expression summarizations, we adjusted for multiple testing using both the false discovery rate (FDR) with a cutoff of 1%, in line with the GTEX project<sup>2</sup> and also a more stringent Bonferroni-based cutoff adjusting for the number of LD-independent SNP-feature pairs. These multiple testing thresholds corresponded to  $p < 1.0 \times 10^{-4}$  and  $p < 2.6 \times 10^{-9}$ , respectively, across the 5 feature summarizations.

We examined only eQTL associations of 682,828 unique genetic variants to a total of 70,204 nearby expression features, mapping back to 9,271 Ensembl IDs (of which 7,057 had HGNC symbols) that were at Bonferroni significance in our dataset and that replicated in the two independent datasets (Figure 3A, Table S10). We highlight the best SNP for each feature in Table S11, and have a complete database, including statistics and visualizations, of all significant and replicated eQTLs online (as well as significant control-only eQTLs) via a user

friendly browser at <http://eqtl.brainseq.org>. The majority of eQTLs (N=417,276, 61.1%) associated with features in a single Ensembl gene, and another large subset associated with features in two nearby genes (N=133,286, 19.5%). Conversely, the majority of genes were associated with more than 1 LD-independent SNP (76.3%) across the feature summarizations, including approximately half (49.0%) of genes having features associated with more than 3 LD-independent SNPs, suggesting that multiple variants can associate with expression independently of each other, and potentially result in more normally-distributed expression levels at the population-level. Furthermore, the eQTL effects (discovered in multiple/mixed ancestries) were largely consistent between Caucasian and African American subjects (Figure 2B). The most significant SNP for each eQTL feature was extremely proximal to the feature (based on nearest coordinate), with a median < 50bp (IQR less than -15kb to 15kb, Figure 2C). Lastly, we found the largest effect sizes on average for the junction and ER eQTLs (see Supplementary Results, Figure 2D).

While the majority of genes with features as eQTLs have multiple possible Ensembl isoforms, 67.0% of exon eQTLs and 31.1% of junction eQTLs were specific to a single Ensembl transcript when multiple transcripts existed for a given gene. Furthermore, 640 (11.2%), 1,123 (37.5%) and 10,698 (52.7%) of replicated junction, transcript, and expressed region eQTLs respectively, corresponded to novel transcriptional activity, including 387 alternative exonic boundary and 253 exon-skipping junction eQTLs and 4,036 alternative exonic boundary (crossing an intron and exon, and extended UTRs) and 6,662 intronic and intergenic ERs. These results indicate that performing both exon- and junction-level eQTL analyses together provide an encompassing view of genetic regulation of expression, as exon-level analyses identified eQTLs for the most genes as well as transcript-specific events, and junction-level analysis provided the largest biological effect sizes and the ability to identify potentially novel transcript isoforms. Together these eQTL results, based on analyses across multiple feature summarizations from RNA sequencing data, demonstrate more widespread genetic regulation of expression than previously reported, including extensive transcript specificity and regulation of unannotated sequence in the human brain.

There was moderate concordance across the different feature summarizations. Exon-level summarizations resulted in the largest number of unique genes as eQTLs (N=6,698) and transcript-level summarizations resulted in the fewest (N=1,708). While the junction eQTLs were less likely to appear in the GTEX project likely because of the lower coverage, and therefore replicate, those that did replicate tended to have larger effect sizes than other summarizations, with a median 36% (IQR: 19-63%) change in expression per allele copy (Figure 2D). Expressed region-level analysis identified the second most eQTLs to unique genes (N=5,381) and effect sizes (median: 25%, IQR: 16-42%). Gene-level eQTL analysis, which is the de-facto approach in RNA-seq analysis, resulted in the smallest eQTL effects, with a 7% (IQR: 4-11%) change in expression per allele copy, and identified fewer unique genes than exon and expressed region analysis (N=4,934). These data suggest that most eQTLs involve specific transcript isoforms whose signals may be diluted when examining only gene-level expression data. If this dilution when using gene counts results from averaging over potentially transcript-specific eQTLs, then mapping all expressed features (sans expressed regions) to all known Ensembl transcripts, and tabulating the proportion of eQTLs that appear relatively transcript specific should confirm this.

In fact, there was extensive evidence of transcript-specificity of replicated eQTLs across exons, junctions, and transcripts.

## 6. Characterization of schizophrenia risk-associated expressed features

We found significant enrichment of this directional consistency between the GWAS, case-control, and FDR-significant (34 loci across 444 eQTL features and 91 Ensembl genes,  $OR=2.00$ ,  $p=4.2 \times 10^{-6}$ ) as well as with the more conservative Bonferroni-significant (19 loci across 161 features and 44 Ensembl genes,  $OR=4.67$ ,  $p=7.97 \times 10^{-8}$ ) features

The majority of our eQTLs (SNP-feature pairs) had directionally consistent allelic effects in the 50 fetal samples ( $N=628$ , 82.2%,  $p < 10^{-20}$ ) and a subset were marginally significant (at  $p < 0.05$ ) even in this small sample size ( $N=162$ , 21.2%). As further evidence for similar genetic regulation, every eQTL that was marginally significant in the fetal samples was directionally consistent with the eQTL effect in the adult samples. For example, we find the most significant and replicated association with clinical directional consistency between rs4523957 (PGC rank 47) and exons (as well as other feature types, see Table S15) in Serine Racemase (*SRR*, Figure 4B), an NMDAR modulator previously associated with schizophrenia<sup>3</sup>. While the statistical significance of exon associations were only slightly better than at the gene level ( $2.1 \times 10^{-12}$  versus  $5.44 \times 10^{-11}$ ), the effect size was almost three times larger (-0.16 versus -0.06). Similarly we identified significant eQTL association between rs324017 (PGC rank 103), and exon- and junction-level expression of *STAT6* (Figure 4C), a transcription factor involved in interleukin signaling<sup>4</sup> whereas there were no significant and replicated eQTLs at the gene-level.

The approach that was unconstrained by annotation also identified novel associations to schizophrenia risk, for example, the eQTL of rs6434928 (PGC rank 33) with intronic sequence in the *HSPD1* and *HSPE1* heat shock protein genes (Figure 4D,E), which are co-chaperonins linked by a common bidirectional promoter<sup>5</sup>. While both genes were recently highlighted in the subset of 20 PGC GWAS genes that are targets of currently approved drugs<sup>6</sup>, the strictly intronic annotation of the eQTL association may suggest a different mechanism of risk from this locus in schizophrenia, and thus a different requirement for a therapeutic agent. Finally, we highlight the eQTL association between rs13240464 (PGC rank 16) and the expression level of a novel splice junction in *IMMP2L* (Figure 4F,G), a gene important in directing mitochondrial proteins to the mitochondria<sup>7</sup> and that has been previously associated with autism and Tourette Syndrome<sup>8</sup>.

### Supplementary Discussion

This proportion of genetic risk variants that are brain eQTLs – 42.5% – far exceeds previous reports using microarray and gene level (count-based) RNA-seq approaches. For example, of the 18 index SNPs labeled as eQTLs in Supplementary Table 4 In the PGC publication<sup>9</sup>, only 8 risk loci had variants moderately linked (at  $R^2 > 0.6$ ) to significant (at  $p < 10^{-4}$ ) brain eQTLs. Our results highlight the enhanced detection of eQTL signals from GWAS-

positive risk variants using RNA-seq to quantify convergent measures of expression beyond the usual gene-level quantification in large collections of postmortem human brains.

In the original GWAS report, while there were only 18 reported index SNPs with brain eQTLs to a total of 30 genes, many of the reported eQTLs were themselves not GWAS-significant variants, being only weakly linked (at  $R^2 < 0.6$ ) to the best GWAS SNP. There were only three of these 18 GWAS- and eQTL-significant index SNPs (putatively associating with *C10orf32* (*BORCS7*), *AS3MT*, *OGFOD2*, *NAGA*, and *CENPM*) that were present in our larger RNA-seq data from the three independent studies that we surveyed. Similarly, a recent GWAS and eQTL integration analysis based on peripheral blood eQTLs identified very few overlapping genes<sup>10</sup>. These genes included *PCCB*, *SNX19*, *GATAD2A*, and *IRF3* as directionally-consistent eQTLs (with regard to the GWAS, eQTL, and case-control differences described above), and *SF3B1* and *PSMA4* as non-directionally consistent eQTLs, suggesting the need to query the disease-relevant tissue, i.e. human brain. Interrogating annotation-agnostic expression features added a considerable number of loci with eQTL signal further highlighting the value of RNA sequencing-based datasets. For example, we have recently dissected the GWAS signal in the 10q24.32 region in a more focused analysis based on the expression features highlighted in the current report. There we identified based on junction-level analysis a novel risk-associated isoform of *AS3MT* that is missing exons 2 and 3<sup>11</sup>. This analysis showed that the previously referenced genetic association with this locus to *AS3MT* was inaccurate, as no association was found to the full length *AS3MT*<sup>11</sup>, and importantly, the novel isoform does not have arsenic methyltransferase activity. Furthermore, eight additional loci, with clinical risk variants associating with expression of *SNX19*, *NRGN/VSIG2*, *HSPD1*, *GATAD2A/NDUGA13*, *VPS45*, *GPM6A*, *SOX2-OT*, and *BRINP2*, were identified here (and subsequently replicated) only via junction- and expressed region-level analysis.

## References

- 1 Frazee, A. C. *et al.* Ballgown bridges the gap between transcriptome assembly and expression analysis. *Nature biotechnology* **33**, 243-246, doi:10.1038/nbt.3172 (2015).
- 2 Human genomics. The Genotype-Tissue Expression (GTEx) pilot analysis: multitissue gene regulation in humans. *Science* **348**, 648-660, doi:10.1126/science.1262110 (2015).
- 3 Labrie, V. *et al.* Serine racemase is associated with schizophrenia susceptibility in humans and in a mouse model. *Human molecular genetics* **18**, 3227-3243, doi:10.1093/hmg/ddp261 (2009).
- 4 Shimoda, K. *et al.* Lack of IL-4-induced Th2 response and IgE class switching in mice with disrupted Stat6 gene. *Nature* **380**, 630-633, doi:10.1038/380630a0 (1996).
- 5 Ryan, M. T. *et al.* The genes encoding mammalian chaperonin 60 and chaperonin 10 are linked head-to-head and share a bidirectional promoter. *Gene* **196**, 9-17 (1997).
- 6 Lencz, T. & Malhotra, A. K. Targeting the schizophrenia genome: a fast track strategy from GWAS to clinic. *Molecular psychiatry* **20**, 820-826, doi:10.1038/mp.2015.28 (2015).
- 7 Nunnari, J., Fox, T. D. & Walter, P. A mitochondrial protease with two catalytic subunits of nonoverlapping specificities. *Science* **262**, 1997-2004 (1993).
- 8 Petek, E. *et al.* Molecular and genomic studies of *IMMP2L* and mutation screening in autism and Tourette syndrome. *Molecular genetics and genomics : MGG* **277**, 71-81, doi:10.1007/s00438-006-0173-1 (2007).

- 9 Ripke, S. *et al.* Biological insights from 108 schizophrenia-associated genetic loci. *Nature* **511**, 421-+, doi:10.1038/nature13595 (2014).
- 10 Zhu, Z. *et al.* Integration of summary data from GWAS and eQTL studies predicts complex trait gene targets. *Nature genetics* **48**, 481-487, doi:10.1038/ng.3538 (2016).
- 11 Li, M. *et al.* A human-specific AS3MT isoform and BORCS7 are molecular risk factors in the 10q24.32 schizophrenia-associated locus. *Nature medicine*, doi:10.1038/nm.4096 (2016).
